# Supplementary material for: A New Family of DNA Viruses Causing Disease in Crustaceans from Diverse Aquatic Biomes
Source: PubMed Central journal article supplement (PMC6960288; doi:10.1128/mbio.02938-19), 2020-01-14
Supplement: mBio.02938-19-sf001.pdf [file mBio.02938-19-sf001.pdf]

## packaging ATPase

cluster PaV1\_21 aligned with representative Pitho-, Irido, Marseille-, and Poxviruses

```

*      20      *      40      *      60      *      80      *      100     *      120     *      140     *      160     *      180     *      2
gene_47_46_DhV1 : METATPNDTSVFEQNHDFLRHGWVGEQNDPFEANGGVVVEGRGESLGNRTLKNANEEGDEEKENSALgggvvklieegvedgeeddeeyeggdvdekedgeeyedgdseggeeeagdeeeeeeeeeeeeeeeeeedgngeldegeaddsnvuvnveecngvVDDTATEDPPIININICLDR-----TFQ--- : 189
gene_21_PaV1 : -----MNNAFLNGKEREEEEaaaaaggggssssnyayydgddgggdddddgggggggnddvlevvfddddgdcdTKsrrrrrgeeeeeeakeegrrggggdrrrgtgrgrkrirrvveeeeeeeenddgqvedFTIGENDFaetaaegeeeeeeagNVPPSLQRYDVPL-----SPPRFP : 176
gene_39_CmV1 : -----MRdedifiddemvuvveageakeeeddddnirnddddGLINKHRQLLIYKRNMDNTFLEVVEEITFGqggqqqqneeeeeeggeeevvveeddddededeeeeeekktLaaaavevekeeehNTQKNDdd : 138
Marseillevirus_marseilleviru : -----MPPRKKSEGGKQVNIKIPWDILN-----SYF-----MPPRKKSEGGKQVNIKIPWDILN-----SYF : 26
Lausannevirus@YP_004347124 : -----MGRKKAVDSDSQKVLNIKIPWDILA-----CPD-----MGRKKAVDSDSQKVLNIKIPWDILA-----CPD : 28
Tokyovirus_A1@YP_009254940 : -----MPPRKKEDGQKTLNIRPFDLLN-----SYF-----MPPRKKEDGQKTLNIRPFDLLN-----SYF : 25
Infectious_spleen_and_kidney : -----MEIKELSLTE-----IRF-----MEIKELSLTE-----IRF : 13
Invertebrate_iridescent_viru : -----MIELQDETTIKIKPLDIDM-----INP-----MIELQDETTIKIKPLDIDM-----INP : 22
Scale_drop_disease_virus@ARU : -----MSVPVKELSMTE-----IRF-----MSVPVKELSMTE-----IRF : 15
Frog_virus_3@YP_031593 : -----MEQVPKEMRLSD-----IRF-----MEQVPKEMRLSD-----IRF : 16
Armadillidium_vulgare_irides : -----MTDICEYDIKPFYADI-----I-----MTDICEYDIKPFYADI-----I : 17
Daphnia_iridescent_virus_l0g : -----MADDIIDEDVFDLVERKILLSR-----PGL-----MADDIIDEDVFDLVERKILLSR-----PGL : 25
Wiseana_iridescent_virus@YP : -----MNEIQDNTIIRPLDLDI-----INP-----MNEIQDNTIIRPLDLDI-----INP : 21
Lymphocystis_disease_virus@Y : -----MES-----TEIKELDINY-----VRF-----MES-----TEIKELDINY-----VRF : 16
Shrimp_hemocyte_iridescent_v : -----MSEIIQIKELDINS-----IRF-----MSEIIQIKELDINS-----IRF : 17
Diadromus_pulchellus_ascovir : -----MEDEFVINEEHPFI-----IAP-----MEDEFVINEEHPFI-----IAP : 17
Trichoplusia_ni_ascovirus_2c : -----MASRYMSSPFLSSSSSSSSSSSVVEEYNESDSVKSVTLSSSPNPGTLINDIVIPCFHPNL-----IAP-----MASRYMSSPFLSSSSSSSSSSSVVEEYNESDSVKSVTLSSSPNPGTLINDIVIPCFHPNL-----IAP : 66
Canarypox_virus@NF_955294 : -----MDIVREVKENRTS-----ILS-----MDIVREVKENRTS-----ILS : 16
Myxoma_virus@NF_051834 : -----MNRFNKQCFSRKS-----ILR-----MNRFNKQCFSRKS-----ILR : 16
Nile_crocodilepox_virus@YP_7 : -----MVSRIEEVRFDRNS-----ILA-----MVSRIEEVRFDRNS-----ILA : 17
Oxf_virus@NF_957885 : -----MDVVQEVRFKRES-----LIE-----MDVVQEVRFKRES-----LIE : 16
Salmon_gill_poxvirus@YP_0091 : -----MTTSEFDRLN-----LKA-----MTTSEFDRLN-----LKA : 13
Vaccinia_virus@YP_233037 : -----MNCFQEKCFSRFN-----ILK-----MNCFQEKCFSRFN-----ILK : 16
Amsacta_moorei_entomopoxviru : -----MSEEDYDK-----IRA-----MSEEDYDK-----IRA : 11
Anomala_cuprea_entomopoxviru : -----MTIEKIDYDK-----IIS-----MTIEKIDYDK-----IIS : 13
Melanoplus_sanguinipes_entom : -----MKIKKENFDT-----LKE-----MKIKKENFDT-----LKE : 13
Mythimna_separata_entomopoxv : -----MVSEEDYNT-----LRK-----MVSEEDYNT-----LRK : 12

```

frameshift

```

00      *      220     *      240     *      260     *      280     *      300     *      320     *      340     *      360     *      380     *
gene_47_46_DhV1 : -----QNVGKRKRRTsselsdgggsgskkkknhnnll-----irnhhEIFFFGKLRKSFSSVSEFAPGSWFVVGPPDSGKTIKAVKSFFLDKFNQSRINLQFFPHYTTTIAEEVDSFSNIIKPK-----SNKI-----N-----ADARSPIKWNENYRS-----FKNVIIVYDDVV : 337
gene_21_PaV1 : EHVINDSDGGREFPKRSGRKRSADHASVEAKRQKTHQSastaaaavtttdataggegrgzeeeeedsLlyGRFQSFSEFKEGSNYVVGPPDSGKTIKAVKSFFLDKFNQSRINLQFFPHYTTTIAEEVDSFSNIIKPK-----SNKI-----N-----KVF-----EKRTIEW-----LNENFEK-----EKKVIVYDDIC : 350
gene_39_CmV1 : dvveevvvvaeeekvveeenneerkrpleeeeeqpkkkqkttt-----ttedddddeakVFRSFAEFNKGSWVVGPPDSGKTIKAVKSFFLDKFNQSRINLQFFPHYTTTIAEEVDSFSNIIKPK-----SNKI-----N-----KVAAEKRIKSDW-----LNENFG-----kkkVIVYDDIC : 298
Marseillevirus_marseilleviru : -----SA-----SYI-----VVGNPSSGKSNFSTSCAYY-LRHRYPVAKIVSGT-----ETENQTFHQ-----YEPFL-YISTKY-----DA-----NA-ELNYVGPQKAKRDKKCK-----NSAAVYDDIC : 117
Lausannevirus@YP_004347124 : -----SA-----TFI-----VIGNPPSSGKTIKAVKSFFLDKFNQSRINLQFFPHYTTTIAEEVDSFSNIIKPK-----SNKI-----N-----HA-ELQYNARQKAKTKKCK-----NLSAVYDDIC : 119
Tokyovirus_A1@YP_009254940 : -----SA-----SYI-----ACGNPSSGKSNFSTSCAYY-LRHRYPVAKIVSGT-----ETENQTFHQ-----YEPFL-YISTKY-----DA-----DR-ELKYIARQKAKKDKRACK-----NPLSAYDDIC : 116
Infectious_spleen_and_kidney : -----VKEDDEMGGM-----KLI-----VIGKPCQKGSVLRKSLIAA-KRHIIIPAAVVISGS-----EEANHFYSK-----LINC-FYNYKE-----DA-----DI-TRVRQQLALKNVDFE-----HSQLVYDDIC : 111
Invertebrate_iridescent_viru : -----NFANFMDPNQGGSKIF-----KLF-----VIGKPCQKGSVLRKSLIAA-KRHIIIPAAVVISGS-----EEANHFYSK-----LINC-FYNYKE-----DA-----DI-TRVRQQLALKNVDFE-----HSQLVYDDIC : 111
Scale_drop_disease_virus@ARU : -----RTH-----DDE-IGGMKRI-----VIGKPCQKGSVLRKSLIAA-KRHIIIPAAVVISGS-----EEANHFYSK-----LINC-FYNYKE-----DA-----DI-TRVRQQLALKNVDFE-----HSQLVYDDIC : 113
Frog_virus_3@YP_031593 : -----NPKSID-TDLGGTRIV-----KLF-----VIGKPCQKGSVLRKSLIAA-KRHIIIPAAVVISGS-----EEANHFYSK-----LINC-FYNYKE-----DA-----DI-TRVRQQLALKNVDFE-----HSQLVYDDIC : 117
Armadillidium_vulgare_irides : -----NPSESNYTTAGGSKIV-----KLF-----VIGKPCQKGSVLRKSLIAA-KRHIIIPAAVVISGS-----EEANHFYSK-----LINC-FYNYKE-----DA-----DI-TRVRQQLALKNVDFE-----HSQLVYDDIC : 118
Daphnia_iridescent_virus_l0g : -----RTH-----DDE-IGGMKRI-----VIGKPCQKGSVLRKSLIAA-KRHIIIPAAVVISGS-----EEANHFYSK-----LINC-FYNYKE-----DA-----DI-TRVRQQLALKNVDFE-----HSQLVYDDIC : 113
Wiseana_iridescent_virus@YP : -----NFENNYTDASQGGSKIF-----KLF-----VIGKPCQKGSVLRKSLIAA-KRHIIIPAAVVISGS-----EEANHFYSK-----LINC-FYNYKE-----DA-----DI-TRVRQQLALKNVDFE-----HSQLVYDDIC : 121
Lymphocystis_disease_virus@Y : -----NDSSTIETD-IGGMKRI-----VIGKPCQKGSVLRKSLIAA-KRHIIIPAAVVISGS-----EEANHFYSK-----LINC-FYNYKE-----DA-----DI-TRVRQQLALKNVDFE-----HSQLVYDDIC : 116
Shrimp_hemocyte_iridescent_v : -----NVESMKTIDIGMKRIA-----KLF-----VIGKPCQKGSVLRKSLIAA-KRHIIIPAAVVISGS-----EEANHFYSK-----LINC-FYNYKE-----DA-----DI-TRVRQQLALKNVDFE-----HSQLVYDDIC : 117
Diadromus_pulchellus_ascovir : -----NKHNYRRVQGGSKIV-----KLF-----VIGKPCQKGSVLRKSLIAA-KRHIIIPAAVVISGS-----EEANHFYSK-----LINC-FYNYKE-----DA-----DI-TRVRQQLALKNVDFE-----HSQLVYDDIC : 117
Trichoplusia_ni_ascovirus_2c : -----REDTFMDQNGGSKIF-----KLF-----VIGKPCQKGSVLRKSLIAA-KRHIIIPAAVVISGS-----EEANHFYSK-----LINC-FYNYKE-----DA-----DI-TRVRQQLALKNVDFE-----HSQLVYDDIC : 117
Canarypox_virus@NF_955294 : -----DYF-----RMA-----LVGSSGSKTIYLSLFDL-LVTRKYKHIFLFPV-----YNSAYDSY-----VWEDH-----VKNVT-----TF-----EE-DYALITTKQKIEKVECKGKIK-----ADMFLYDDIC : 111
Myxoma_virus@NF_051834 : -----DYF-----RMA-----LVGSSGSKTIYLSLFDL-LVTRKYKHIFLFPV-----YNSAYDSY-----VWEDH-----VKNVT-----TF-----EE-DYALITTKQKIEKVECKGKIK-----ADMFLYDDIC : 111
Nile_crocodilepox_virus@YP_7 : -----DDF-----RIV-----LVGSSGSKTIYLSLFDL-LVTRKYKHIFLFPV-----YNSAYDSY-----VWEDH-----VKNVT-----TF-----EE-DYALITTKQKIEKVECKGKIK-----ADMFLYDDIC : 110
Oxf_virus@NF_957885 : -----AEF-----RMA-----LVGSSGSKTIYLSLFDL-LVTRKYKHIFLFPV-----YNSAYDSY-----VWEDH-----VKNVT-----TF-----EE-DYALITTKQKIEKVECKGKIK-----ADMFLYDDIC : 107
Salmon_gill_poxvirus@YP_0091 : -----EPF-----RAA-----LVGSSGSKTIYLSLFDL-LVTRKYKHIFLFPV-----YNSAYDSY-----VWEDH-----VKNVT-----TF-----EE-DYALITTKQKIEKVECKGKIK-----ADMFLYDDIC : 125
Vaccinia_virus@YP_233037 : -----MEF-----RMV-----LVGSSGSKTIYLSLFDL-LVTRKYKHIFLFPV-----YNSAYDSY-----VWEDH-----VKNVT-----TF-----EE-DYALITTKQKIEKVECKGKIK-----ADMFLYDDIC : 112
Amsacta_moorei_entomopoxviru : -----KEF-----NMA-----LVGSSGSKTIYLSLFDL-LVTRKYKHIFLFPV-----YNSAYDSY-----VWEDH-----VKNVT-----TF-----EE-DYALITTKQKIEKVECKGKIK-----ADMFLYDDIC : 115
Anomala_cuprea_entomopoxviru : -----TFP-----NMA-----LVGSSGSKTIYLSLFDL-LVTRKYKHIFLFPV-----YNSAYDSY-----VWEDH-----VKNVT-----TF-----EE-DYALITTKQKIEKVECKGKIK-----ADMFLYDDIC : 118
Melanoplus_sanguinipes_entom : -----RFF-----NMS-----LVGSSGSKTIYLSLFDL-LVTRKYKHIFLFPV-----YNSAYDSY-----VWEDH-----VKNVT-----TF-----EE-DYALITTKQKIEKVECKGKIK-----ADMFLYDDIC : 115
Mythimna_separata_entomopoxv : -----NEF-----NMA-----LVGSSGSKTIYLSLFDL-LVTRKYKHIFLFPV-----YNSAYDSY-----VWEDH-----VKNVT-----TF-----EE-DYALITTKQKIEKVECKGKIK-----ADMFLYDDIC : 114

```

```

400          *          420          *          440          *          460          *          480          *          500          *          520          *          540          *          560          *          580          *
gene_47_46_DhV1 : N-HseqkkvvgagqgnssaskqkF--HRLLEELVTKSRRLKADITTSYHTLEPSTNSISYYMF-----IGRSGVFINNLGnanstknksasknEasLCCDIDGTVFQNWQLQSTFLSEAGDFRILFYDRNACY----- : 466
gene_21_PaV1 : S-DDK-----GRGSKKVSAN--STYQSELVRFESRHAKAHYlittyyvtldtttSSFTYSMCICKMGDVVDLGAESVTRKRLREMATIFKCDVDQVLTLIDTVNE-----KEDFNNSDRLVIVYHNQNKTFRWTLHRRPAPETDEMKRYIDYLLLEVPQCFFIKNGAARLANMRRRAEKQRHgnataagggggg : 529
gene_39_CmV1 : spsdnsssssssgkzkkkaasaw--akyqsCVVRFESRHAKAHYlittyyvtldtttSSFTYLMCI-----CKMAHlsgggsggggdskkkHETANIFKCDVDQIALADTVMMGESEDFGNDRLVIVYNNQDKNFRWNLHRRPASPDEMKRYVEDY-----LLETIFC : 456
Marseillevirus_marseilleviru : A-DDP-----KIL-RSPLNNSFFKNSRHNDGIFLLAAGLDT-GVCKSASYFVLF-----YEASLVE-----REKWRNE----- : 182
Lausannevirus@YP_004347124 : S-DNU-----SIY-RQPVVNAVYFKLSRHANAVVFFLHGAIETLPGSKCGSFFVVF-----YEPSPIE-----REKWRNE----- : 185
Tokyovirus_A1@YP_009254940 : A-DDP-----KTL-RSPIMTSFFKNSRHNDGIFLLTLAGLDPAPGVKCKASYVVF-----YEASLVE-----REKWRNE----- : 182
Infectious_spleen_and_kidney : M-DNA-----RMF-NHEAVMLFKNSRHNNVLVIAS-YIMDNASLCCIDGVFLF-----TETSQC-----VDKTKCF----- : 176
Invertebrate_iridescent_viru : M-DET-----SVF-NKTPQPALFKNRHHNKMLYVALCYALDKPGISNIDGVFIF-----RESNVAI-----PKRYDNY----- : 187
Scale_drop_disease_virus@ARU : M-DNT-----KLF-NNEVADLFFKNSRHNNLVIAS-YIMDKADLCSIDGVFLF-----SESNLTS-----CEKTKCF----- : 178
Frog_virus_3@YP_031593 : M-DNA-----RMF-NDREVRALFKNSRHNNVLVIAN-YVMDTDDLSSVDGVFLF-----RENNVTY-----RDKTYNF----- : 182
Armadillidium_vulgare_irides : T-EDK-----KIF-SSKYQCALFKNSRHNMFYLSLCHSTDPPSITNVNVDGVFIF-----RETNENN-----LKNYTYNY----- : 183
Daphnia_iridescent_virus_l0g : F-SDI-----KKM-CEPPTPWIFKVCRRYRINYVVMYCNDRKEDTNCVDGVFLF-----NEQNT-----RKAHSCF----- : 178
Wiseana_iridescent_virus@YP : M-DDP-----SVF-NKAPCPGLFKNRHHNKMLYVSLCYALDKPHISNIDGVFIF-----RESNVAI-----PKRYENY----- : 186
Lymphocystis_disease_virus@Y : M-DDS-----KLF-CDKMVMDLFFKNSRHNNLVIAS-YVMDKFDVSTIDGVFLF-----REPNSY-----KERWLNK----- : 181
Shrimp_hemocyte_iridescent_v : M-DDV-----KVF-NDPLIQGLFKNSRHNNLVIAS-YVLDKFDVSTIDGVFLF-----REPNSN-----REKTKNF----- : 182
Diadromus_pulchellus_ascovir : T-DNK-----NVF-KSENCQGLFKNRHHNKMLYLSLQCYCIDPPAPATCVDGTFIF-----RETNEKN-----LKNYDNE----- : 182
Trichoplusia_ni_ascovirus_2c : A-SST-----KNF-NGPIQGLFKNSRHNMFYLGVDYPRDIPVTAFCSDGVFLF-----ATGNSDV-----MKKTFE----- : 230
Canarypox_virus@NF_955294 : G-DAQ-----L-KSKLLPWLNTCRRIRNSIYMICTYRHPITNCSSTITHLCC-----NVSDAD-----VENLRSM----- : 171
Myxoma_virus@NF_051834 : G-DKQ-----T-KSSCLLDFLNHRRLNLSVLLCQTYKHPVNGSSTITHFCCC-----NVSDSD-----TENLRSM----- : 173
Nile_crocodilepox_virus@YP_7 : G-DLQ-----YRSRELAIFFNHRRLNISVAVLCTFRHPHSCSTSTHVLCC-----SVVMND-----LENLKYM----- : 172
Cxf_virus@NF_957885 : G-DTQ-----T-RSPITLGLMNYRRLNLSVLLCQTYRHPVNGSSTITHLCC-----NVSDSD-----VENLRSM----- : 169
Salmon_gill_poxvirus@YP_0091 : D-----SILTKNEGKTFLLTRCRRVNISIVLLDITLCPFMKQNLSHLFFF-----GQVSEKS-----RKLTCG----- : 187
Vaccinia_virus@YP_233037 : G-DKL-----S--KCNTLIEFLNHRRLNLSIYLLCQTYRHPVILGSANITHFCSE-----NISISD-----AENLRSM----- : 174
Amsacta_moorei_entomopoxviru : G-KDT-----KDKLSNFTNVCRRSLVSNFVLRHLEHDTTDSISYHVIN-----SESENMD-----LIPCNKNL----- : 176
Anomala_cuprea_entomopoxviru : G-RET-----KDKLSNFTNECRRLSRISNDFVLRHLEHDKTDSISLYVIN-----SPNINLE-----YLENKSI----- : 179
Melanoplus_sanguinipes_entom : G-NNF-----RNKLNFTNECRRAFISTFLVHKEIHDEPDRSNKFFVIN-----RKTIDLK-----YIIPNTSIRKESKDI----- : 184
Mythimna_separata_entomopoxv : G-KET-----KEKLENFTNECRRLSNISNDFVLRHLEHDTTDSITYYVIN-----SATENLD-----YMQCNKTI----- : 175

```

g RH q 4

```

600          *          620          *          640          *          660          *          680          *          700          *          720          *          740          *          760          *          780          *
gene_47_46_DhV1 : -----YWKKFTAPSTTSIVKDYLNCLKNVPGC-FIKSSNRGGGGDISTeevgdverdedcSNLEHLSVISMMKDISRADPDCVKILQTKNFKIIEREHLKAKAVLFRNKNLIFY-----LYNTFFIMAEYVDKYFNIGQIGQLSGYRELMSEDDKASERD--LITA-VVETIIPHMSG----- : 634
gene_21_PaV1 : didnaeeenewedlgelgggggggedlelelskITMLQSIQCN-----PKVYELLKSKRLDIIERYLRAKAMSNLRNKNLIFY-----LYDLVFVIEYVDRRLQFNQCEGLIRYRDMTED--DKN-----TERDIVNSVIE----- : 661
gene_39_CmV1 : CFIKNRSKMMFaaaaaatageeggeeeeeeeeegeeeasaaaageDL-----EKELTKISMLQSIQSKINPRAYELNNSKRMDEIEKEYLRAKAMLNLRNKNLIFY-----LYDLLFVTIEYVDRKLLINQCEGLTSYRDSMSDD-----DKNT-ERDIVNSVIEC----- : 607
Marseillevirus_marseilleviru : -----GSK-I-----GTFKEFCDLMD-CVCV-DHA-----CMVI-----DNRTQS-KNIEDM-F-----WYRAPH-----PIF-KFKF-GCKQYRKSKE----- : 246
Lausannevirus@YP_004347124 : -----GGI-I-----GTYNFCDLMD-CVCAKPYR-----CMDI-----DNRTKM-KDIEDM-F-----YFDVTP-----CF-KFKF-GCKAYRKHST----- : 249
Tokyovirus_A1@YP_009254940 : -----GSK-I-----GTFKEFCDLMD-CVCV-DHA-----CMVI-----DNRTQS-KNIEDM-F-----WYRAPH-----PIF-KFKF-GCKQYRKSKE----- : 246
Infectious_spleen_and_kidney : -----GGN-I-----P-RQTEHTLME-KVTK-DHT-----CLVI-----DNTTTR-QKWEELM-R-----YKAPL-----LTDV-DVGF-GFKDYKAGVA----- : 239
Invertebrate_iridescent_viru : -----AGI-I-----PTFQLFEKIMD-EITK-DYT-----ALVI-----HNVTIS-NDWRDCE-F-----YKAPF-ENQHVD-CFKF-GCCEYRKYGAR----- : 254
Scale_drop_disease_virus@ARU : -----GGR-I-----P-RFCFMLME-KVTL-DYT-----CLVI-----DNASQT-QHWTEC-R-----YKAPM-----LTNE-DVNF-GFADYKNSAIA----- : 242
Frog_virus_3@YP_031593 : -----ASV-V-----P-RKLYFTVME-TVCC-NYR-----CMFI-----DNTRAT-DNWHDS-F-----WYKAPY-----SKSAVAFI-GARSYKWKYACSKTGE----- : 251
Armadillidium_vulgare_irides : -----AGV-I-----PKFEFKAYMS-CVIG-DYT-----ALVI-----DNAQDNGHWHHEF-S-----YKVPQ-----MDANEMKL-GCHEYIEFGKC----- : 249
Daphnia_iridescent_virus_l0g : -----ASS-I-----P-YFVFSKLMV-ICTD-NFG-----IMFI-----NLSSSVSK-TDWKEFS-Y-----KTRAPE-----VF-DFTF-GCDDYIRFSED----- : 243
Wiseana_iridescent_virus@YP : -----AGI-I-----PSEHLEFEQIMD-SVIG-DYT-----ALVI-----QNTATIT-NDWQCQ-F-----YKAPI-----IN-SFKF-GCPEYRKYAQC----- : 249
Lymphocystis_disease_virus@Y : -----ASI-I-----P-RKYFFDLME-EITQ-DHT-----ALVI-----DNTAINPSSHWSDC-K-----YKATI-----ENV-DEPF-GCEEYKSYII----- : 244
Shrimp_hemocyte_iridescent_v : -----ASV-I-----PTFKIFCHLMD-KLTV-DYT-----SIVYKKNLNNTRNE-EHWYNY-F-----YKACI-----VF-DFTF-GCDDYIRFSED----- : 249
Diadromus_pulchellus_ascovir : -----AGV-F-----PSFGLFKTYME-CVIG-DYT-----ALVI-----DQCQATKDWFDQ-Y-----FKAPI-----VF-EFKF-GCKEYRAFAKDRTRDK----- : 251
Trichoplusia_ni_ascovirus_2c : -----AGD-F-----PDKRETFYKVF-EVTSVDHR-----ALVI-----DYQNRN-GKWFNNY-F-----WQAPH-----PKDIF-DFKE-GSAEYCAVAK----- : 297
Canarypox_virus@NF_955294 : -----S--I-----LTTKPIIRALSVMRTASKGKK-----VYII-----ENTVFS--CRDVR-C-----YDTADKAVINKVN--DISI-LLKQSHMKR----- : 238
Myxoma_virus@NF_051834 : -----SITGS-K-----KDLLKSISIMK--AVSVNRR-----VLIH-----EDSVFS--DGEQR-C-----YDCADE--DVI--AHKIDPSILLKQFSH----- : 239
Nile_crocodilepox_virus@YP_7 : -----SVAVEK-----KRLLRFDVDFC--SNNK-RRK-----VLIH-----ENSLFS--GGRAR-C-----TDVVDK-----RVLA-GELDLVDVLRAC----- : 234
Cxf_virus@NF_957885 : -----SI-R-----GSRKRLIRAMAIMRSAG-TRR-----VLIH-----EDSVFC--CNEFR-C-----YDFADE--SVU--KRCLDPLGILLAQFSH----- : 233
Salmon_gill_poxvirus@YP_0091 : -----AGF-N-----SVCDSQLRMIA--TIDPGHFSLKGSP-----LVLI-----KDNSKAF-F-----KDRANH--DTVKGYKIL--DGLFYRSR----- : 250
Vaccinia_virus@YP_233037 : -----FVRGK-R-----KDIILNLMIC--TARSNNRI-----AIIH-----EDSVFC--EGELR-C-----TDADK--DVI--EQRINIDILVYKSH----- : 240
Amsacta_moorei_entomopoxviru : -----RNS-I-----LASVINIFK--DREQSRYI-----IYCI-----IYDS--VSYS-C-----LISEDD--IE--NIK--NEEDKVFYVYD----- : 232
Anomala_cuprea_entomopoxviru : -----KTM-I-----NTSILNAFS--EYNK-ERG-----LFLI-----IQDSK--YSI-----V-INDS--TIK--TINE-SARNVLYTNS----- : 234
Melanoplus_sanguinipes_entom : -----V-----PLLLQHEKFKG-----LYDI-----I-DNVHAE--FYI-----YISEDE-----MKNL--DNNYFLLSTE----- : 231
Mythimna_separata_entomopoxv : -----V-----KNEIMTDVIN--TYNEYNGK-----LYVI-----IHESI--YTS-----LIRQED--ID--NIK--KEDKYVVFCTES----- : 229

```

# Thymidylate or Deoxyguanosine kinase

cluster PaV1\_15 aligned with nearest Pitho-, Irido, Marseilleviruses

taken from: [ftp://ftp.ncbi.nih.gov/pub/yutinn/Loki\\_Castle\\_NCLDV\\_2018/PIM\\_clusters/PIM\\_afa/pim0066.afa](ftp://ftp.ncbi.nih.gov/pub/yutinn/Loki_Castle_NCLDV_2018/PIM_clusters/PIM_afa/pim0066.afa)

```

*      20      *      40      *      60      *      80      *      100     *      120     *      140     *      160     *
gene_39_DhV1 : MNLIPSSSTLPIYQINSKPRYS-----NVDINGTGDGG-----YVKMNMNEFTLPSRRGCGWGGASRANKSLSLGTFRDNLNRYQRIGL-----SERGNSKLSHGCLIS----- : 93
gene_15_PaV1 : LNG-----GILPFGggggggggrsgssdgdgddAPFtvvtetttttitteittqrtttstkrrrteCLLRETNDESGAfpptpppsssssFAATPRLPEENEFPSSIagvngengaaaaaatgdg : 115
gene_45_CmV1 : MGGHRSaaaaaaRIGFLLRWVFVIISTLSIISWEAELIPILHVAHLVYNFIHIYFAVRGISINGRVGGGGe----eaeeeeefpttttkkttttt-ittttstkttrfrt----raakeeaattptaaaaaeaaat-----tptaaaaaeaaattppt : 151
gene_22_LCMAC101_5 : ----- : -
gene_23_LCPAC101_1 : -----MSAFFKNKSIDGKNIND----- : -
gene_44_LCPAC202_1 : -----MTERLSNGDSYKTVENEIMYQFKVGLTNGKNHSM-SYKLYDIPLGDDPKWMTGLKGTfVRMSN----- : 17
gene_7_LCPAC201_2 : -----MTEQSSNGNSRKRNEADVVTYRVGLMRFtGDDCLITSYKLYDMPLNDDLKWMtGLNGTfVRMSN----- : 64
gene_18_LCPAC001_1 : -----MSSPNIKI-----YNETNE----- : 65
gene_15_LCPAC104_3 : -----MQRIRI-----FSVVNE----- : 14
lym_ir_YF_073536 : ----- : -
fro_ir_YF_031664 : ----- : -
sin_ir_YF_164162 : ----- : -
wis_ir_YF_004732882 : ----- : -
dia_as_YF_009220694 : ----- : -
tri_as_YF_803376 : ----- : -
hel_as_YF_001110907 : ----- : -
spo_as_YF_762395 : ----- : -

```

```

180      *      200      *      220      *      240      *      260      *      280      *      300      *      320      *      340
gene_39_DhV1 : ---HEPEHIYETIKEP-----VPKLTTMKGVFVKHF-----GHDfLNKTLARNVSKGGEARGFQFL-----NTPSLNLKDDA----VPT-----TNRSIGLGRNYALINVDVtGSGKSYFIINK-LVDY : 195
gene_15_PaV1 : gRLLEENEgqqqqqqppppssssAAELPENGfSSSAKETGaaaaaaCKETAEPlyCKMTGdqqddenlddddddgdSNrssrhhphfrfrgqqqqqqqqpppppsptqrgqqqqlaryrLppfpalkkllYDPKRE-GANIVfINVDVtGSGRTVFINNK-LLEPA : 284
gene_45_CmV1 : ---ttteeeeeeattp----ttttteveeedtsttaeveaatttptttt-----tteesttSIVEFDNDGMVYRnsnln-----stsaaaaastnRIGRI-LPT-----YDPREG-GAIVMfINVDVtGSGKTIIFINDT-LIPG : 270
gene_22_LCMAC101_5 : ----- : -
gene_23_LCPAC101_1 : ----- : -
gene_44_LCPAC202_1 : ----- : -
gene_7_LCPAC201_2 : ----- : -
gene_18_LCPAC001_1 : ----- : -
gene_15_LCPAC104_3 : ----- : -
lym_ir_YF_073536 : -----MSKIVCIgENtGSGKTIIV----- : 19
fro_ir_YF_031664 : -----MSIPTVIAfSENtGAGKSTLI----- : 21
sin_ir_YF_164162 : -----MALPFLISVSENtGAGKSSLI----- : 21
wis_ir_YF_004732882 : -----MVYIVTIDAVtGAGKSSLI-SQ----- : 21
dia_as_YF_009220694 : -----MYICIEENtGCGKSSVI----- : 17
tri_as_YF_803376 : -----MIHSIEENtGSGKSTII-NKIVEEY : 25
hel_as_YF_001110907 : -----MSSITE-TESVVVtSVEENtGSGKSSVM-RSV----- : 30
spo_as_YF_762395 : -----MT-TDSVVfSVEENtGSGKSSVM-RKA----- : 26

```

```

*      360      *      380      *      400      *      420      *      440      *      460      *      480      *      500      *
gene_39_DhV1 : LRTRYP-EYRVIVLDQSHILKNEVDGLPDLSDNIFRD-----IKKRYQCSMILEGIRKLSLIERVDATIKTIDADTNP-----RTFIIIEGGFVSGSYIYNKQIMPEVTFQSMSMLIDR-----IYKSTIHLREA : 315
gene_15_PaV1 : LKKHYF-EANVLLVGGQDHILKN--RDINFTFYIIRqhhhhqzrghrPgggggggggggqgngDYSYALQACNSFTKDLFWKLGRIYDSIFVYHKS-----LTFVVIIEGGIGSGFPYVYKRVITDGKKHFMssvfnsrssfssssafpssasasasaasKNYVDFINRHD- : 447
gene_45_CmV1 : LRKSYI-NADIIVGQGDHILNN--PKLDFEAYKND-----GDGGDISHAIKVONLTDALLERLRDIYDIVFNGT-SR---FVFEVILEGGIGSGFPYVYKRVITDKSGLICGVVPSF-----WTDY-KYYD- : 384
gene_22_LCMAC101_5 : LTEANY-KVTVVRPEPV---DR--WRANG--SLKQF-----YKDPGRGY--CFCTRAFHDRIK--ESQEQHKYEH-----TDIFILESIFTDMLFMDIYES-----KTIDSEYRDKDIWAMWGF : 135
gene_23_LCPAC101_1 : LDSLDM-KAKYYPBYV---NH--A-----DINQY-----LSDMRKAY--YFQEMILKRIS--IYKEALEFADC-----GGISVVDICVVGDYA-FATMCHKK-----GYITDEDNMYLSVMEQDRM : 145
gene_44_LCPAC202_1 : INGIGI-KAKFYSEFV---HQ--P-----LIKQY-----IGDMRKYGY--GFCIDVVKERLR--IYKIASEAAK-----GIPIVDFCMLGDIAPAKIYDQ-----GIKEDENYLSLIKREKI : 195
gene_7_LCPAC201_2 : LKGLGI-DATFYSFV---HL--P-----LIEQY-----IGDMRKYGY--GFCIDVVKERLR--IYKIASEAAK-----GIPIVDFCMLGDIAPAKIYDQ-----GIKEDENYLSLIKREKI : 196
gene_18_LCPAC001_1 : LREIGFKNVKKFKBYV---NK--D-----DINQY-----ISDMRKYSY--SFCIDVVKERLE--IYRNAIKYSKT-----GGIPIVDFSLIGDYT-FAHMCKYK-----SNMNEKEWVYVTSIRNGEKK : 146
gene_15_LCPAC104_3 : LNNIGL-NCKFFPEFI---CK--P-----LINQF-----ISNMNRKAY--SFCNMILLQRIN--IYNNAYEFCKS-----GGISVDFSLIGDYT-FAHMFKF-----GNISEEEFRVYKELVLSLKK : 144
lym_ir_YF_073536 : -EELAKEGYAVIRPDI---NL--WQF--IFNNS-----LNNPDRWYF--ISCINIMITQYE--CYKRSKKILFN-----DCCLIVEITPECCLF-FSEVARKI-----GLISYDELDIRKLYNTIK- : 118
fro_ir_YF_031664 : -RGLAAGYEVVPEDF---SR--WGQ--IFEMA-----LEDPNRKF--SSQLKMLIQSE--IQRAAKKSD-----NRVVVLESTTECVLD-FCNVAAMEQ-----GCILPAEHDILVQIWEKVN- : 118
sin_ir_YF_164162 : -AALAKRGYYVQPEDF---TK--WGF--IFNLA-----LAEPKRYK--SSQLKMLVQMD--IQREHRNGT-----RPLVILEASDCVLG-EGKVAIDM-----GLMHVEEYRVEDIHAKL- : 118
wis_ir_YF_004732882 : ---LRDDFTCFQPEV---EE--WS--DIQDF-----YTMPRFA--PFQCVLFSYHK--LYSSFKNV-----KDKVILEFCPSSKNIETNLIYS-----GHITPEYNYCNFYNKVA- : 114
dia_as_YF_009220694 : -KAFANNFVVFPEPI---EK--WT-----LIEEL-----YRDPERAY--PELQCVLISQIE--TNKAIIRLSR-----SCKRIME-SAWASKNVESN-----RNWQSCQIDVLDSCYDLID- : 111
tri_as_YF_803376 : D-----GKVRGITDQV---GN--WN--LIGPM-----YLQPKIHF--PFQCVLISQYN--TMKHLINNTYETLNDDTIIVIE-SEWSSYNVFKRMVND-----GIINKFEHDAYKKFYHYIMD : 126
hel_as_YF_001110907 : -AKHFDDCILFCEPEV---ND--WG-----LLEYM-----YRDPERAF--AFQCVLTSKYH--KWINALDECRRITQ--KRIVVME-SPLSAYKVETRAMRER-----GTISSHQHYTYTQFAEFQP : 132
spo_as_YF_762395 : -AERYDGLVYFCEPEV---EE--WG-----LIMYM-----YNDPERAF--PELQCVLTSKYQ--KWLDSYETCLRITG--ARVVIME-SEWSAYDVETRAMRDR-----GSTIDKQEDVYTDVFRSLEN : 128

```

e

2

66 x

5

```

520      *      540      *      560      *      580      *      600      *      620      *      640      *      660
gene_39_DhV1 : ---DLHIHICI--RSISETKRSQCGRKGS--YYTIDKLLKINTMGNYYRELICGTKESFYYYRDRHLDITFDN-----CIERTVNRVF----- : 396
gene_15_PaV1 : ---QIIDLNVKRDYKSIILRNKMRDRPGVVK-YYTEKKIRQIVDNDKYYPRQNDKIFFVRAIenddddddgteddkkee-----SLYMSVILRVIKARTFYPNDKERLLENKSRITLPWS- : 560
gene_45_CmV1 : ---DIKANI--NPSLRAIRDNVKRNRPQGVK-FYTKRLAQIISNDHKYYSKTGDSRNLFI-----N-----KADYKR-----LCCRVNRPQIGQTNMGGHISCCARDIPLYEFDprpsp1pwkippppSTGSSNKRRRTAKTW : 511
gene_22_LCMAC101_5 : IMPFYPDLEFVYRDPDEVAMEBILHKNREGGT--VDIa-----LCKALQIKHDDFLGGEKVLISDSPDVPCPLHLYT-NS---DFLNDIDV-KRDIAYKLDK-I--YPTKRVGFLITSHSQMVS- : 245
gene_23_LCPAC101_1 : ---RMPSVILYKCPPSVAFERMIKRNKIKSEVSGYTIQ-----YLEDINASYSEAIDKVMGTNIVFEINWKSRSVIS--GILD-----SSTCKKLDCA--KEKIMFNSM----- : 240
gene_44_LCPAC202_1 : ---IEPSLTVYVNCSAEEAYRSMVSSNDAPVGGYTIQ-----YFQREKSYEQIYYGVKPPLRIDWETPRKTHFNES--SHGPIHYL-SDSECEKVLLE-I--RNYLINPI----- : 294
gene_7_LCPAC201_2 : ---IEPSLTVYVNCSAEAYRSMVSSNDAPVGGYTIQ-----YFQREKSYEQIYYGVKPPLRIDWEEPRTYVERI--NQEKHYL-FDLECEKVLLE-I--RNYLINPI----- : 295
gene_18_LCPAC001_1 : ---IMPSLIMVYNTSAQTSYERMIKRGYKSEINGYTIQ-----YFEDIKKNEYVIRNTDCNVINIDWN-----NN--LEMDGSYL-RQSESLKLYK-F--KEFIT----- : 235
gene_15_LCPAC104_3 : ---EEPDIILYVQCLPEIAYKMKKSAGIESISGYSIa-----YFRDINEQYTNNIKLNHPVLTIDWN-----ED--KNLNEDI-----IKVLDI-I--KNYLFY----- : 228
lym_ir_YF_073536 : ---WEPSTLYEINTPIQTLERIGCGRPFPAK-ITAE-----YIMPLDSYFGS-----KE--AIFLDGTLISPEKLCERVKEH-I--TTFNFNHEAV----- : 196
fro_ir_YF_031664 : ---VPVDKIDFNTPEKCMERDAFAGRAFQRD-IPVE-----YISSHSHKFTRPDPYIMSG-----LESKEVVLANAIELKEKI-V--SRNVR----- : 195
sin_ir_YF_164162 : ---AKVDLKLIDTTPDVCVRVIGNDRREFEQA-IGN-----YLTAFHAQFIDAADVKLSGLFP-----KEEVVENFKL-I--AQYNL----- : 191
wis_ir_YF_004732882 : ---FATDLYEIKVDTDVAYRILNDRAPERS-LKEE-----YLETINVKYNESIKTL-----DN--VRIIDANRPLNEIKYVMEI-I--KQI----- : 190
dia_as_YF_009220694 : ---VVPEYTYVLDLPRVCHQSIACNRFEERN-ISID-----YLIERDERYKEELSKLKNITIVI-----DC--GSMTTEQI-VKNI-RDILAI----- : 187
tri_as_YF_803376 : SLYSGVENTYVKTSPDVCMKRISQGRKKEELN-MSRT-----YIEKLNHYHEMVLSSSSSSWSFN-----DS--NNHKVYEIDGNGCNEDMIQ-V--FRVIDEFTS----- : 219
hel_as_YF_001110907 : QL-KSIDHIMHDTTRASTCQVAGEENRKADEA-LSIE-----YLLDVESYTNNYVRDHSSV-----YT--IDGDRSREHVAGELTAFSS-I--RIGHMTI----- : 217
spo_as_YF_762395 : DI-PRIDHWYVDTKPDTCHEACERGREAKS-LDVE-----YFERVECYTKRYVDNHSSVVFV-----LN--GNLPREDV--LASFNRVLDG-I--VESS----- : 210

```

r

R

E

y

6

# RNApB; DNA-dependent RNA polymerase subunit RPB2

cluster PaV1\_25 aligned with representative Pitho-, Irido, Marseilleviruses

gene\_54\_DhV1 : ...MANTEACV...KCHRGLYENI...LSVIRKMYDDV...NFVFRIGLI...LNICTE...-----RNIYLK...ITNT...YLQYPSNIDL...IRERC...----NNTNLGIEAR...YKYG...--VCCG...--KI...KIESFAR...FEMIG...-NFDK...: 111
gene\_25\_PaV1 : ...ttttvvataaaeeeeeeeLNNKCT...VPHLPYQNI...NDM...HYSRIP...TIFYRDRIF...PILKE...-----RRIYET...IERVEYILPCR...HGIRCT...LQSMS...--NMTSSMR...LIR...YMDG...--SFAG...--TV...RLEFFVE...IFEMIG...-VFDG...: 129
gene\_35\_CrV1 : ...---MSH...HHHLPRYQNV...DDM...NFSHVP...TIFHENRIF...PILKE...-----RRIYET...IDVVEYILPCR...NNITQT...LQSMS...--DMTSSVRL...YK...EMDD...--AFVD...--TV...RLEFFVE...IFEMIG...-LFDH...: 107
Golden\_Marseillevirus\_YF\_009 : ...MNIITNDLWNVFEW...FSQGHAAHHC...QAYNEFVQELF...NIREKGRIVIGED...EDDKPKGEKK...-----SEKGTWFKDVE...INPA...FAGELD...FAEIDGLTR...LFD...F...DART...TRGIE...FVPLTC...D...V...T...TA...--DGKV...--TK...ERKT...AHIF...MVGS...-NLONLVA...: 146
Tokyovirus\_Al\_YF\_009254756 : ...---MDALNDRKLNKLFKVW...FSQTGPAHHC...QAYNEFVQELF...NIREKGRVIEDREE...EVEDEDEE...---RAAPA...A...K...K...S...W...F...V...E...E...T...N...P...T...F...G...R...V...T...R...E...V...D...R...I...K...I...F...S...D...A...R...R...R...G...I...P...S...A...F...F...Y...C...D...I...T...TA...--DGET...--AV...EQ...T...I...A...B...I...F...M...V...S...-C...L...O...N...L...T...: 152
Melbournevirus\_YF\_009094523 : ...---MNAISDQI...WELFEW...FSQTGPAHHC...QAYNEFVQELF...NIREKGRVIEDREE...DAAEEENDEDEE...---K...K...S...W...V...C...V...E...T...N...P...T...F...G...R...V...T...R...H...F...D...D...R...I...K...I...F...S...D...A...R...R...R...G...I...P...S...A...F...F...Y...C...D...I...T...TA...--DGET...--A...E...Y...K...Q...T...I...A...B...I...F...M...V...S...-C...L...O...N...L...T...: 152
Brazillian\_marseillevirus\_YF : ...MNTLSDL...LWDIFRNR...FAQCGPAHHC...QAYNEFVQELF...NIREKGRVIED...REDDAAEEENDEDEE...---K...K...S...W...V...C...V...E...T...N...P...T...F...G...R...V...T...R...H...F...D...D...R...I...K...I...F...S...D...A...R...R...R...G...I...P...S...A...F...F...Y...C...D...I...T...TA...--DGES...--K...Y...P...R...E...I...A...B...I...F...M...V...S...-C...L...O...N...L...T...: 152
Lausannevirus\_YF\_004346997 : ...MNSLSE...QI...LWLFVHR...WNETGPAHHC...QAYNEFVQELF...NIREKGRVIED...REDDAAEEENDEDEE...---K...K...S...W...V...C...V...E...T...N...P...T...F...G...R...V...T...R...H...F...D...D...R...I...K...I...F...S...D...A...R...R...R...G...I...P...S...A...F...F...Y...C...D...I...T...TA...--DGES...--K...H...H...R...I...T...A...B...I...F...M...V...S...-C...L...O...N...L...T...: 156
Wiseana\_iridescent\_virus\_YF : ...TLISE...VRLIKVCF...FTINGLVKHC...DIFN...WITSK...G...K...N...I...N...N...E...P...S...I...K...Y...S...N...Y...D...-----NYTK...E...S...N...I...C...V...E...P...T...I...I...D...N...T...I...R...E...Y...E...S...E...A...R...N...D...I...S...I...T...G...N...V...C...D...I...E...T...I...E...S...--N...E...G...K...P...P...K...Y...R...V...P...A...K...I...F...M...I...S...-D...T...O...H...I...: 136
Infectious\_spleen\_and\_kidney : ...MQAHSYW...TAPQRLVHH...HA...EHLIRV...C...I...Q...V...E...G...E...P...P...V...I...H...N...-----H...S...V...T...G...D...V...A...Y...S...K...P...-----S...E...P...E...T...G...H...A...R...A...Y...D...E...T...V...T...V...S...C...R...A...Y...I...T...C...M...A...--T...G...A...K...-----H...V...Q...H...I...H...I...A...R...M...V...M...R...A...P...P...L...C...: 112
Lymphocystis\_disease\_virus\_Y : ...MLKRLTAH...HES...Y...K...F...I...F...D...F...T...V...A...Q...D...K...I...I...K...A...N...-----F...T...V...K...E...K...I...Y...N...K...P...-----K...L...T...E...L...E...A...R...Q...D...L...T...S...I...S...I...D...Y...D...-----D...F...-----N...G...K...S...-----V...V...-----L...E...T...E...S...L...E...P...M...I...K...-K...I...C...: 93
Singapore\_grouper\_iridovirus : ...MHQIVAH...H...D...S...E...S...M...L...W...R...D...F...N...I...A...R...E...K...P...I...E...V...K...-----Y...V...I...K...E...S...L...Y...E...M...P...--V...K...E...A...D...I...T...R...I...T...E...A...P...R...Q...D...I...T...V...Q...A...A...C...C...V...N...V...D...P...-----H...G...R...E...-----T...I...Y...P...R...E...I...C...K...L...F...M...V...G...S...-S...L...C...W...: 107
Frog\_virus\_3\_YF\_031641 : ...MSPKISVASM...ILLK...D...M...E...E...F...H...L...Y...V...S...S...A...N...H...P...S...N...F...R...H...E...S...F...D...M...L...W...N...E...F...--A...V...A...R...E...K...P...V...S...V...K...-----Y...R...K...G...T...V...R...Y...E...P...--C...P...D...G...K...P...W...E...K...L...E...M...A...R...T...D...A...T...H...S...A...A...V...C...D...I...T...D...P...-----K...G...L...E...-----T...V...Y...P...R...E...I...C...K...I...F...M...V...G...S...-A...V...C...W...T...: 138
Orpheovirus\_IHUMI\_LCC2\_YF\_00 : ...SKLDEHG...KLLFKY...VQYEKPTS...F...I...F...P...E...M...Y...N...Y...T...F...N...L...I...S...S...K...P...I...K...T...Q...N...G...-----Y...A...V...--S...E...I...R...Y...E...R...K...Y...S...G...N...G...T...Q...L...D...I...Y...A...K...A...R...N...D...G...K...D...T...A...A...R...R...G...L...K...Y...Y...F...N...N...A...-----N...E...L...V...-----A...E...H...K...D...I...Q...I...F...S...I...F...M...V...G...S...-V...I...C...R...: 124
Pithovirus\_sibericum@YF\_0090 : ...RLKISE...S...E...L...L...K...S...Y...-----L...T...F...S...G...T...D...D...T...Q...G...Y...N...V...W...T...E...C...F...C...F...S...R...L...P...L...R...T...G...-----D...H...Y...E...I...N...P...R...M...Y...P...--V...I...E...T...K...S...G...T...V...I...E...L...I...A...R...S...R...N...I...T...S...S...L...Y...V...D...A...Y...R...N...G...A...P...V...I...R...T...I...N...G...V...E...--Q...A...W...K...M...K...Y...G...R...V...E...M...I...G...S...-V...I...C...H...: 135
Cedratvirus\_All\_YF\_009329295 : ...GRISEN...G...E...L...L...K...S...Y...-----I...T...Y...S...G...F...T...G...D...I...T...N...Y...N...F...I...I...K...E...F...E...C...I...R...A...P...R...L...A...D...-----Y...I...V...Y...I...N...P...F...A...D...P...E...--S...T...E...A...S...N...E...K...V...E...L...I...T...A...R...C...R...N...I...T...S...S...P...F...Y...A...B...I...V...Y...R...N...G...-----C...E...V...A...-----R...H...E...K...P...V...E...M...I...G...S...-V...I...C...H...: 125

gene\_54\_DhV1 : ...--DFSN...TLEEKYERGIICA...--FVCNGLLA...SSLEE...QIK...N...I...P...V...E...--NRT...F...Q...I...N...I...P...S...I...C...I...F...I...--DKDLHFTEK...V...I...V...--EEG...C...O...K...Y...Q...A...-----R...K...K...N...E...K...G...T...K...K...F...F...I...H...G...G...V...R...L...V...H...-----L...S...Y...K...N...E...I...F...L...N...H...D...N...P...S...Q...N...Y...L...A...K...L...R...H...--I...G...N...D...P...K...T...V...N...Y...I...S...T...-----: 249
gene\_25\_PaV1 : ...--DHSN...STLQKYENGLVGT...FIINGMV...K...SS...F...E...E...Q...I...K...N...T...P...I...S...-C...K...K...S...R...I...L...F...D...K...L...F...Y...D...E...T...V...R...E...K...A...G...R...G...A...S...S...Y...Y...--E...R...G...Y...I...K...Y...Q...-----A...T...E...R...T...K...G...L...W...R...F...I...I...N...G...R...A...V...--Q...-----L...S...Y...T...S...N...L...Y...L...F...D...H...E...P...S...K...Y...L...Q...C...I...K...D...Y...F...N...G...D...V...A...T...A...Y...U...D...-----: 276
gene\_35\_CrV1 : ...--DHSN...TTSQKYENGLVGT...FIINGMV...K...SS...F...E...E...Q...I...K...N...T...P...I...S...-Y...K...K...R...R...T...R...F...D...K...L...F...Y...D...--C...T...I...D...S...G...G...S...Y...T...Y...--E...R...G...I...Y...I...K...Y...Q...-----A...T...E...K...T...G...I...W...R...F...F...I...D...A...R...K...K...V...V...--Q...-----L...S...Y...T...S...N...L...Y...L...F...D...H...E...L...S...P...K...Y...L...Q...C...I...K...D...Y...F...N...G...D...V...A...T...A...Y...U...D...-----: 250
Golden\_Marseillevirus\_YF\_009 : ...LRRNTC...KGQREILMP...ED...L...K...G...Y...F...I...N...-R...E...I...V...V...C...S...E...R...G...A...G...R...V...Y...T...-S...E...K...Q...M...R...G...M...P...K...Y...D...V...H...S...E...I...R...V...S...A...T...S...T...R...T...T...T...Y...V...G...L...-E...N...G...L...A...V...F...Y...G...Q...H...I...S...-----S...S...G...V...L...C...V...M...E...A...L...G...V...S...Y...L...D...L...L...K...--Y...--I...K...L...S...D...R...K...H...Q...R...S...F...L...V...S...S...L...N...A...R...G...L...F...F...K...S...R...K...R...E...F...T...Q...Q...R...A...L...R...M...D...A...K...L...I...T...-----: 310
Tokyovirus\_Al\_YF\_009254756 : ...--RYNL...QGDECRQRG...ED...P...L...R...G...G...Y...I...N...E...-R...E...I...V...V...C...S...E...R...G...A...G...R...V...Y...T...-A...D...K...Q...A...N...K...M...P...K...Y...E...V...H...S...E...I...R...I...S...A...T...S...N...T...R...T...T...T...Y...V...G...L...-E...N...G...V...A...M...L...Y...A...Q...H...L...S...-----E...K...G...I...P...L...C...V...L...E...A...M...G...I...S...Y...L...D...L...L...K...--F...--F...I...K...A...N...L...T...R...E...Q...R...S...L...I...P...S...L...E...H...A...R...A...M...F...H...S...R...K...Q...R...V...Q...T...M...A...K...A...L...V...O...G...Y...K...N...E...K...G...I...D...D...L...P...: 323
Melbournevirus\_YF\_009094523 : ...--RYNL...QGDECRQY...G...E...D...M...K...G...G...Y...F...I...N...E...-R...E...I...V...V...C...S...E...R...G...A...G...R...V...Y...T...-A...D...K...Q...A...N...K...M...P...K...Y...E...V...H...S...E...I...R...I...S...A...T...S...N...T...R...T...T...T...Y...V...G...L...-E...N...G...V...A...M...L...Y...A...Q...H...L...S...-----E...K...G...I...P...L...C...V...L...E...A...M...N...F...S...Y...L...D...L...L...K...--F...--T...R...G...L...T...R...E...Q...R...G...F...L...I...P...S...L...E...H...A...R...A...M...F...S...S...R...K...N...R...V...S...M...V...K...A...V...A...G...Y...K...P...K...G...V...E...L...P...: 321
Brazillian\_marseillevirus\_YF : ...--RYNL...VGDACYQK...L...D...P...L...R...G...G...Y...F...I...N...E...-R...E...I...V...V...C...S...E...R...G...A...G...R...V...Y...T...-S...E...K...Q...M...R...G...M...P...K...Y...D...V...H...S...E...I...R...V...S...A...T...S...N...T...R...T...T...T...Y...V...G...L...-E...N...G...V...A...M...L...Y...A...Q...H...I...S...-----S...S...G...I...P...L...C...V...L...E...A...M...G...V...S...Y...L...D...L...L...K...--Y...--V...P...K...I...S...A...Q...R...H...L...P...S...L...E...Q...A...R...A...M...F...E...K...S...R...K...R...E...A...T...I...Q...K...A...L...G...I...E...N...G...K...T...-----: 314
Lausannevirus\_YF\_004346997 : ...--RYNL...SGDSCYK...K...W...E...D...N...K...G...G...Y...F...I...N...E...-R...E...I...V...V...C...S...E...R...G...A...G...R...V...Y...T...-S...E...K...Q...M...R...G...M...P...K...Y...D...V...H...S...E...I...R...V...S...A...T...S...N...T...R...T...T...T...Y...V...G...L...-E...N...G...V...A...M...L...Y...A...Q...H...I...S...-----P...S...G...I...P...L...C...A...L...E...A...M...G...T...S...Y...L...D...L...L...K...--Y...--V...K...L...S...N...E...Q...R...T...H...L...I...P...S...L...E...Q...A...R...V...M...F...E...K...S...R...K...N...R...E...A...T...I...Q...K...A...L...G...I...E...N...K...Q...T...-----: 318
Wiseana\_iridescent\_virus\_YF : ...--RQFT...PGENESLN...GH...S...E...A...L...Q...G...Y...F...I...N...G...K...R...V...I...S...Q...V...R...A...N...K...P...L...C...V...K...T...S...Q...K...E...D...--V...I...I...C...E...M...S...M...C...D...E...T...F...H...S...I...S...V...Q...M...K...I...N...K...I...V...S...L...K...L...K...G...K...-----V...V...D...I...P...V...G...I...F...K...S...L...G...H...P...D...T...Q...F...H...H...L...F...D...L...P...K...K...N...Y...L...E...T...I...R...N...N...C...H...E...E...F...S...T...E...G...A...A...S...D...E...S...D...E...S...D...E...D...D...V...K...V...R...N...V...S...: 304
Infectious\_spleen\_and\_kidney : ...--GIGCEK...P...G...G...F...I...N...G...K...R...V...I...P...H...I...T...A...N...I...P...I...T...H...C...T...T...K...K...-----I...I...V...C...E...M...P...T...H...N...E...T...G...N...L...L...K...V...R...L...-M...Q...C...I...E...M...S...V...P...Y...I...-----K...S...F...P...A...G...A...F...N...A...L...G...V...S...E...D...M...R...--Y...--C...N...L...A...W...Q...R...T...Q...G...G...Y...S...E...H...I...A...M...Q...Y...M...L...S...Q...Y...R...E...Q...D...P...F...E...Y...A...K...I...V...A...-----: 257
Lymphocystis\_disease\_virus\_Y : ...--I...T...C...E...G...E...T...F...E...L...C...P...N...P...G...G...F...I...N...G...K...R...V...I...P...H...I...R...P...R...V...P...M...I...K...-Y...E...D...G...-----T...L...Y...C...E...F...F...S...E...N...G...N...S...I...L...I...Q...A...K...T...-D...G...K...I...L...D...E...F...S...L...P...Y...I...-----K...Q...F...V...E...A...G...T...F...K...T...L...G...I...S...F...E...Q...A...F...L...-Y...--C...G...L...Q...R...D...R...E...G...C...I...T...C...R...K...P...G...Y...E...S...L...T...I...L...H...R...Y...--T...R...N...K...T...V...D...T...V...P...L...N...V...: 242
Singapore\_grouper\_iridovirus : ...--TRQRQDM...R...G...C...E...L...P...G...G...F...I...N...G...K...R...V...I...P...H...I...P...A...D...H...E...V...V...H...E...Q...G...P...-----S...W...I...C...E...F...F...S...V...N...E...I...T...Q...C...S...V...L...V...Q...A...R...T...-D...C...R...R...I...E...F...S...L...P...Y...I...-----K...Q...Y...V...V...G...T...F...K...A...L...G...K...I...A...E...A...V...A...--L...--C...G...L...-G...V...K...E...G...D...S...F...S...C...H...T...S...S...H...O...T...I...A...L...I...E...Q...Y...S...N...C...P...E...D...A...L...Q...V...A...K...Y...V...D...T...K...: 261
Frog\_virus\_3\_YF\_031641 : ...RTEG...S...P...L...P...G...E...C...P...N...P...G...G...F...I...N...G...K...R...V...V...P...H...I...P...A...D...Q...P...C...V...-N...K...N...D...-----G...W...I...C...E...F...F...S...V...N...E...I...T...R...Q...T...V...L...V...Q...A...K...T...-D...C...R...R...I...E...F...S...L...P...Y...I...-----K...Q...Y...V...V...G...I...F...K...A...L...G...K...I...A...E...A...V...A...-----M...C...G...L...G...S...F...L...G...E...V...S...C...R...T...V...H...H...Q...S...M...A...L...L...M...E...Q...H...A...S...A...P...E...D...P...V...A...A...K...H...V...D...G...R...S...V...Y...: 295
Orpheovirus\_IHUMI\_LCC2\_YF\_00 : ...--TYPLRT...P...E...E...L...I...S...V...G...Q...D...E...D...Y...G...G...F...I...N...G...K...R...V...I...P...H...I...R...P...R...V...P...M...I...K...-Y...E...D...G...-----L...R...E...K...D...K...G...R...E...E...M...I...C...R...M...--T...I...N...G...P...K...N...S...E...I...I...I...N...I...D...E...K...T...I...L...L...E...L...G...F...L...G...K...D...S...G...K...F...S...I...S...F...L...P...F...A...L...Y...G...I...D...P...N...I...M...-----N...L...V...I...Q...K...I...E...F...N...R...E...V...K...I...V...L...Q...R...T...V...A...A...Y...Q...N...I...T...N...H...D...Y...L...A...N...R...M...E...-: 289
Pithovirus\_sibericum@YF\_0090 : ...--LHQK...T...D...E...E...K...F...A...M...G...E...C...P...N...P...G...G...F...I...N...G...K...R...V...I...P...H...I...R...P...R...V...P...M...I...K...-Y...E...D...G...-----E...T...V...C...K...M...--V...C...A...T...P...R...G...T...M...V...G...L...S...M...-G...D...N...R...S...I...R...L...G...H...L...F...L...G...K...G...D...T...M...G...V...F...Q...A...F...R...I...F...R...A...Y...N...M...L...P...P...E...A...S...P...-A...-----T...Y...A...V...W...V...L...S...F...V...E...K...H...K...K...I...Q...S...V...I...Q...T...S...L...V...D...M...L...S...I...A...D...D...F...E...Y...L...R...S...V...I...P...: 294
Cedratvirus\_All\_YF\_009329295 : ...--LYGI...T...D...E...E...K...M...E...I...G...E...C...P...N...P...G...G...F...I...N...G...K...R...V...I...P...H...I...R...P...R...V...P...M...I...K...-Y...E...D...G...-----G...V...V...C...R...F...--T...S...Y...T...S...R...G...T...S...L...I...D...I...V...R...-G...E...N...R...A...I...R...A...L...H...L...F...L...G...K...E...K...T...M...-P...V...L...A...F...R...I...L...N...Y...H...G...I...L...S...E...G...T...D...V...--L...-----Q...I...T...W...E...V...I...T...F...E...K...H...R...K...K...I...Q...A...L...I...Q...S...S...L...I...E...V...A...G...I...N...S...Y...E...Y...L...R...T...I...N...P...: 284

gene\_54\_DhV1 : ...--DENY...--DEKIKEMNLN...Kitffqkiiita...--kyFEWHISTIP...H...NS...I...K...H...R...K...I...N...R...G...I...T...S...K...N...N...V...-F...L...O...Q...L...K...-----S...I...I...N...M...K...O...--N...N...K...F...E...H...A...L...K...--N...N...I...A...F...--K...T...R...V...S...V...L...N...I...E...P...I...D...R...D...K...N...I...F...: 365
gene\_25\_PaV1 : ...--LEY...--VETRFSPNDRYFYQK...KITIIVA...--KYLEWQMATVEN...H...A...N...I...Q...Q...R...V...R...R...N...I...D...S...S...P...A...F...I...C...A...L...R...-----R...F...F...V...T...F...E...K...O...--N...N...R...F...H...A...L...K...--N...N...I...P...I...F...--K...M...R...K...E...S...S...L...N...I...E...S...L...D...R...D...K...N...G...I...V...: 350
gene\_35\_CrV1 : ...--LEER...--IRTAFSPNDQFYQK...KITIITA...--KYLEWQM...T...V...P...N...H...A...N...I...Q...Q...R...V...R...R...N...I...D...S...L...S...P...A...F...I...R...E...L...R...-----H...F...F...L...T...F...E...K...O...--N...N...R...F...H...A...L...K...--N...N...I...P...I...F...--K...M...R...K...E...S...S...L...N...I...E...S...L...D...R...G...N...K...N...K...L...V...: 365
Golden\_Marseillevirus\_YF\_009 : ...--VEE...V...N...L...V...P...C...--YKRVEEK...V...H...C...Y...L...A...R...A...I...K...V...K...V...G...E...R...E...A...E...D...R...I...H...A...N...R...V...D...C...V...D...T...L...I...N...I...F...Y...S...M...N...Q...T...T...R...F...I...K...D...S...--C...L...E...K...-----G...R...I...T...D...P...L...R...A...I...-Q...T...G...M...T...K...K...I...K...A...L...T...O...N...--H...S...Y...N...-----T...K...S...K...T...G...T...S...Y...N...E...R...Y...-N...V...I...A...: 440
Tokyovirus\_Al\_YF\_009254756 : ...ADEAEIKLA...--VWVATL...S...K...D...R...K...P...C...--YR...E...A...D...K...K...V...E...H...C...Y...L...A...R...A...L...K...V...K...T...G...D...K...K...P...E...D...R...E...H...Y...T...N...R...I...D...C...V...D...S...L...I...N...I...F...Y...S...M...N...Q...T...T...R...F...I...K...D...S...--C...K...G...-----E...R...T...A...D...P...L...K...P...I...-H...S...K...N...I...K...K...R...T...A...M...S...T...O...N...--H...S...S...F...N...-----T...K...T...K...Q...G...T...S...Q...L...Y...E...R...M...-N...G...V...A...: 468
Melbournevirus\_YF\_009094523 : ...PSDAEVKLA...--VWAATL...S...K...D...K...P...C...--YR...E...A...D...K...K...V...E...H...C...Y...L...A...R...A...I...K...V...K...T...G...D...R...Q...P...E...D...R...E...H...Y...T...N...R...V...D...C...V...D...S...L...I...N...I...F...Y...S...M...N...Q...T...T...R...F...I...K...D...S...--C...K...G...-----E...R...T...A...D...P...L...K...P...I...-R...S...K...S...I...K...K...R...T...A...M...S...T...O...N...--H...S...S...F...N...-----T...K...S...K...Q...G...T...S...Y...N...E...R...Y...-N...I...V...A...: 466
Brazillian\_marseillevirus\_YF : ...--TQSL...L...N...T...E...P...--YK...E...M...E...E...K...V...E...H...C...Y...L...S...R...A...I...K...V...K...T...G...E...R...E...P...E...D...R...E...H...Y...A...N...R...V...D...C...V...D...S...L...I...N...I...F...Y...S...M...N...Q...T...T...R...A...I...R...D...S...--C...G...G...K...-----G...R...N...S...P...L...K...I...V...-Q...S...K...S...E...K...K...G...N...A...L...T...O...N...--H...S...Y...N...-----T...G...K...K...P...G...I...S...Q...F...Y...E...R...F...-N...G...I...G...: 444
Lausannevirus\_YF\_004346997 : ...--TKS...I...D...I...L...P...H...--YK...T...A...E...E...K...I...D...E...H...C...Y...L...A...R...A...I...K...V...K...G...E...R...E...P...E...D...R...E...H...Y...A...N...R...V...D...C...V...D...S...L...I...N...I...F...Y...S...M...N...Q...T...T...R...A...I...R...D...S...--C...E...G...K...-----G...R...N...S...D...P...L...K...I...V...-Y...S...K...L...T...K...K...S...M...A...L...T...O...N...--H...S...S...F...N...-----N...T...K...K...T...G...T...S...Q...F...F...E...Y...-N...O...V...S...: 447
Wiseana\_iridescent\_virus\_YF : ...--VIADREGI...--LTMEDI...C...D...M...D...P...H...L...I...G...T...Q...R...I...D...I...L...V...K...Y...L...L...T...M...G...D...I...P...V...D...R...I...D...Y...N...H...R...V...E...T...A...G...E...Y...Y...E...R...I...L...Y...K...K...F...Q...T...C...V...A...I...K...N...R...K...E...D...I...-----S...N...E...I...R...T...S...G...L...T...G...L...Y...S...S...G...Y...G...V...Q...R...-----N...A...Y...I...R...G...V...S...V...Q...V...N...K...R...V...S...L...I...A...: 450
Infectious\_spleen\_and\_kidney : ...--QPT...--VTAEYVRSV...L...G...V...H...C...H...--T...P...D...M...S...G...Q...H...G...Y...V...A...T...L...I...T...A...H...V...G...A...V...H...R...D...N...L...R...W...R...V...D...T...S...G...A...I...L...F...E...R...M...L...F...K...W...C...T...V...K...R...V...M...E...K...S...C...V...V...G...-----V...P...D...L...G...K...S...G...S...V...N...A...I...T...V...N...V...H...L...A...F...A...T...O...N...--H...L...V...R...K...N...S...G...T...S...K...N...Y...T...P...R...G...V...S...Q...L...M...C...V...C...-N...Y...G...A...: 407
Lymphocystis\_disease\_virus\_Y : ...--KCD...--DRESVVEAT...I...K...K...E...I...H...N...L...E...-D...H...S...F...F...N...V...A...R...H...E...V...D...R...I...A...T...I...A...S...G...E...A...A...L...T...D...I...A...N...R...V...D...T...S...G...V...I...E...I...F...E...L...K...Y...V...L...I...R...N...S...L...E...T...L...R...N...P...D...-----P...I...N...V...K...N...V...Q...I...N...S...L...I...C...F...A...T...O...N...--H...S...V...K...K...-----T...G...P...P...S...Y...V...R...V...G...V...S...C...I...L...C...N...-N...Y...G...A...: 386
Singapore\_grouper\_iridovirus : ...--KSS...--DKREYVK...T...V...N...R...E...F...L...H...--GGGASH...G...V...K...R...L...A...Q...A...A...G...I...S...K...P...L...E...D...R...E...D...I...A...N...R...V...D...T...T...G...I...E...M...L...D...L...G...I...K...Q...Y...V...L...F...L...K...S...A...E...-C...Q...K...N...-----L...C...P...Y...T...V...I...C...N...S...V...I...N...S...H...L...C...F...A...T...O...N...--H...T...V...K...R...-----I...G...P...P...S...Y...V...R...V...G...V...S...C...I...L...C...N...-N...Y...G...A...: 400
Frog\_virus\_3\_YF\_031641 : ...KQAE...G...A...K...A...K...Y...A...D...R...A...S...V...E...E...D...R...N...A...K...S...R...E...D...Y...V...R...H...V...A...G...E...T...L...H...--G...G...D...A...E...H...G...V...V...K...M...A...D...A...A...S...I...G...T...C...D...R...I...D...I...A...N...R...V...D...A...T...G...I...A...I...E...L...D...L...G...I...K...Y...V...L...F...V...K...S...A...G...-C...Q...K...N...-----L...C...P...Y...T...V...I...C...N...S...M...V...I...N...S...H...L...C...F...A...T...O...N...--H...T...V...K...R...-----I...G...P...P...S...Y...V...R...V...G...V...S...C...I...L...C...N...-N...Y...G...A...: 456
Orpheovirus\_IHUMI\_LCC2\_YF\_00 : ...--AGSLTTN...--DKMRLTAKT...S...E...G...M...S...H...I...P...--S...S...P...Q...N...R...L...H...M...A...Y...I...A...I...S...A...E...Y...L...S...L...R...K...P...E...D...R...N...S...W...S...I...G...I...Q...A...E...V...A...K...R...M...G...D...I...R...Y...L...G...R...I...T...O...D...I...E...S...T...V...S...S...D...N...A...G...-----L...P...T...I...R...E...I...R...G...L...E...N...I...S...D...I...T...S...I...G...K...N...K...G...Y...K...T...-----S...Q...N...S...Y...Y...R...E...G...V...I...V...T...H...P...R...G...-S...A...I...D...: 440
Pithovirus\_sibericum@YF\_0090 : ...--GAK...--ASDAELAQ...T...S...D...E...L...P...C...--M...S...E...P...I...N...K...I...Y...M...S...I...A...Q...Y...A...Y...I...A...G...L...R...G...I...D...R...D...N...V...N...G...R...F...E...S...A...G...P...S...L...Q...I...F...G...I...D...I...N...K...A...V...N...T...A...E...A...S...I...A...S...I...V...S...D...K...R...E...I...E...R...Y...S...S...G...H...E...L...F...K...R...Y...F...R...A...N...I...T...D...E...A...V...D...S...F...T...P...N...-G...V...R...-----G...S...Y...T...K...N...I...D...T...L...N...R...E...-S...V...I...S...: 446
Cedratvirus\_All\_YF\_009329295 : ...--RE...--ISEVLAQA...T...D...L...P...C...--T...T...D...V...T...N...K...L...F...M...A...L...T...A...Q...Y...M...A...Y...I...A...G...L...R...G...I...D...R...D...V...S...N...G...F...E...S...A...G...V...S...L...Q...I...F...G...I...N...K...I...T...N...A...E...A...S...I...E...E...T...T...R...N...S...K...A...I...R...-----G...D...V...I...A...M...V...S...K...I...K...F...I...N...I...T...D...E...A...V...D...T...F...T...P...G...S...G...I...K...-----G...S...Y...A...K...N...N...I...D...T...L...N...R...E...-S...V...I...S...: 431



gene\_54\_DhV1 : FNDHTRISSTVNNINVKVD--ETRAFDFSSALFICFHNSHDG-RKICGLIKQLINVTVLS--SYQPLVKG-----EYYSV-----LEYFL-MGIDGGEVNLI--NCEVDSTMRCLFDITKSNINYNICIKLRKK-YSHISCFVEN---NNYVDSSESRPVEFLV : 510  
gene\_25\_PaV1 : YDDHTRISSSINNVNKNVD--KIRFYDSSALFICFHNSHDG-RKICGLIKQLISGTRIS--VAPAEFVSAT-----FVLDA-----SSAGMVRGDDVGVGSSSALLDGTVTCTIKRRTVYLVDYRCCMAIKRV-HPHVSVYVRD---NNYVDSSTRGRPINVRV : 541  
gene\_35\_CrV1 : YDDHTRISSSINNVNKNVD--RIRFYDSSALFICFHNSHDG-RKICGLIKQLISGTRIS-aaaaapaapaaaaaaaapaaaaapaallLFDI-----ASVgltgrtgggggtttllgrtVUCELNCSRDTVSVDYRCCISIKRVYHPHVSVMYVHD---NNYVDSSTRGRPINVRV : 533  
Golden\_Marseillevirus\_YF\_009 : AVSNPKRIHAAIGTE-NMTR--FRRHESYSGFVADTPEKERTGSKVMG-GATLS--IGCSFV-----EFFE-----SSLDDFLQDFGQGTFFFNQMVIGST--RNFVGLSTLSGLK-TSNN-ICWDCSFVYDKYFDEPRNCDAQRLEPLV : 584  
Tokyovirus\_Al\_YF\_009254756 : SASNPKRHAAIGTE-NMTR--FRRHESYSGFICPDTPESKDKTGSKVLA-SATVS--LGTIE-----SALEDFSQDFGLETFFNQVMIGST--DSPRALGALSVLK-RAGN-FFWDCCFVDEKHNPRNCDAQRLEPLV : 612  
Melbournevirus\_YF\_009094523 : SCSNPKRHAAIGTE-NMTR--FRRHESYSGFICPDTPESKDKTGSKVLA-SATVS--LGTVE-----SALEYFSQDFGLETFFNQVMIGST--NSPKELGELSVLK-RAGD-FFWDCCFVDEKHNPRNCDAQRLEPLV : 610  
Brazilian\_marseillevirus\_YF : SASNPKRIHAAIGTE-NMTR--FRRHESYSGFVADTPEKERTGSKVLA-SATVS--LGTTE-----GAIPEFSRDFGKGTFFFNQVIAGST--ETPEELAVLIDMK-RSNN-FFWDCCFVYDKKFEDEPRNCDSQRLEPLV : 588  
Lausannevirus\_YF\_004346997 : A-SNPKRIHAAIGTE-NMTR--FRRHESYSGFVADTPEKERTGSKVLA-SALVS--LGCSE-----DAIPEFSRDFEGECTFFFNQVIAGST--QNPEFLSVLSLK-RSNN-FFWDCCFVYDKKFEDEPRNCDAQRLEPLV : 590  
Wiseana\_iridescent\_virus\_YF : NYSSFRVWIPESKD-KEANTSETRCHPSSSFLICVETEPG-KGCVTLNMSFCSVT--TGISTC-----DHFDLILICRKRKNSCNTLILNGSFFSKLGHANTINNFMGDK--SISIVVNKHL--KIDPEFSDFGRLEPLV : 596  
Infectious\_spleen\_and\_kidney : RISNPKRMTHAVGFK-KNIR--VRCFHNSHNGICVYETEPG-DRVGNVQLASATID--VPCFR-----NIRTL-----MSALPREADPQGNQPV--NCEIVGVWDRMLCGMAIMHMLD---YEDVTVVFRHG--YGRVYVSEGRFRPLV : 546  
Lymphocystis\_disease\_virus\_Y : RLSHPRIMHAVGFK-KNFR--IRRHASHYGFICVYETEPG-ERVGVNLNTASTAFS--QGIPKN-----QIKPL-----MFLK-----ESGYFRV--NCEIVGVY--NDPNETKLLRSVL--PD-GVSVFCHRTFPEIKCHVSDQRLEPLV : 523  
Singapore\_grouper\_iridovirus : RLSHPRIMHAVSFK-KNIR--VRCFHSHYGFICVYETEPG-ERVGVNLNMAESAIVS--DYTPRE-----DITAI--DRAGGMPGYEKTAELSHLAWSSSDTFSAYVDCRLAGFT--TEPREFKEAKIRLSAQVG-VCWDRIE----DDEHLGCCGRFRMRMD : 551  
Frog\_virus\_3\_YF\_031641 : RVSHPRIMHAVSFR-KNIR--VRCFHSHYGFICVYETEPG-EKGVNLNMAEGAGFS--LETPRE-----VVLAT--RLGKGLPGFFEGAPARLAWSGAASASVD--VGVLCGVY--GDFVGFREARLCLPGVSV----VHKKVE--REDEHLGCCGRFRMRMD : 605  
Orpheovirus\_IHUMI\_LCC2\_YF\_00 : AIGFCQVSAANTNKKSKQPP--VRAICQSCYGLICVGDTEPG-EPCGIVVKATISYFA--HDRPNS-----SIVNIA-----NAHSVDPISLERENL--NNAEPFGWCNSTDLRRI--VEARRQLL--DFDICIVVDAS--GAIIVSDDAGRFRPLV : 581  
Pithovirus\_sibericum@YF\_0090 : SYACIKRINTPTRRQAKQPH--IRMCQMSLGLVDEVEEPG-RAVGLIKHKA-GAYAS--LPDDT-----VIVEQ-----REYLAARSETATNGC--NREFVGVWCAGTELKDF--ISLKRSC-RISH-FTSISIYRD--NVYVYVTDGSSLEPLV : 587  
Cedratvirus\_All\_YF\_009329295 : TLSQIKRINTPTRRQAKQPH--IRMCQMSLGLVDAIETEPG-RAVGLIKHKA-GAQSA--PADDDK-----LIICQ-----LFFINVTYSEETPNGV--CNKFIQWGLGKVKRRI--IDMRRKR-TVPQ-FTSVALHYD--NVYVYVTDSSKLEPLV : 572

46 g R 3 6cp 3Pe G 600 620 640 660 680 700 720 740 lg 6 gR r 6

gene\_54\_DhV1 : NENEIVYF-----DNAECWYLSIQALTLNTSLNET-----VPRICCESAPFSSILKH-IPFSTN : 564  
gene\_25\_PaV1 : NARESFLF-----DSAECWHLDLSRSM--KNMD-----AGSAH-----VPRLOCTAAAFSAIVGKIINRAY : 597  
gene\_35\_CrV1 : NEREFFWF-----DNAECWYLELSKSM--KNMD-----dddaaatttr-----VPRLOCAAAAFSAIVSKVIRKAF : 595  
Golden\_Marseillevirus\_YF\_009 : VKDGGIVFTSEDAFRLRMTLAGHEASVSWQEFITRGIVFVDAEQCE-HLVIC--PDVEQL-----NKSIVAGRSK-----VTHCELHPILVYGVCSSTHPSAN : 677  
Tokyovirus\_Al\_YF\_009254756 : VKDGLKIFGQEHFERLK-----RGDITWQEFVGLGIVEILDAEQCE-HSLIC--PSAEQL-----SQSKTK-----VTHCEIHPILVYGVCSSTHPSAN : 694  
Melbournevirus\_YF\_009094523 : VEGGKLRFGPEHYERLM-----KGTITWQEFVGLGIVEILDAEQCE-HSLIC--PSAEQL-----GQSEKSE-----VTHCEIHPILVYGVCSSTHPSAN : 693  
Brazilian\_marseillevirus\_YF : VKDGLKIVKREHHEKMM-----NGEMTWQDFLGLGILEFVDAEQCE-HSFLC--PSAEEL-----GEGKK-----VTHCEMHPILVYGVCSSTHPSAN : 669  
Lausannevirus\_YF\_004346997 : VQDGLKIVFEEHRLRKL--DGELTWQDFLSLGIIVEYDAEQCE-HMLIC--PSAEEL-----GKHKR-----VTHCEIHPILVYGVCSSTHPSAN : 671  
Wiseana\_iridescent\_virus\_YF : LNKRIKSGELIPSFNW-----FLENQLIKYVDINE--VITNC--VAIEPL-----DIVENPKSK-----VNLMLHPICMFGIVAGIIFESDR : 671  
Infectious\_spleen\_and\_kidney : RGQYRMV-----CPSLVQELIRPFPSPTER-----VVSMDSMRAD-----EMDLP-GIVVLTIDAMSAVIEFYNH : 605  
Lymphocystis\_disease\_virus\_Y : NDK-----IVRC--AQEI-----HHIA-----VRELPAYSI-MTIDAMSAVIEFYNH : 562  
Singapore\_grouper\_iridovirus : PARIRGEPFIEIPLSLSL----KRTVTIAPSVGRLEEHTQNLISKYIYC--IQEI-----NCGTVGKD-----VLDPPASEI-LTDAMSAVIEFYDH : 631  
Frog\_virus\_3\_YF\_031641 : PEGIRGSGYDSPFAPEK-----RDIEMDFAPSSSPSDSLPCPF--GVYIC--AQEL-----SVCSLGDGE-----VADPPASEI-LTDAMSAVIEFYDH : 684  
Orpheovirus\_IHUMI\_LCC2\_YF\_00 : VGSDF--GILEIDRKKMW-----DASFEDLLKNGCIVEYLDWEQEMHSYIA--IGLERVRSRPNEEQEIKRSLGYINTELEAVTMAIERLDEI-ANNINARPGNMWTQ--EETDELKEM-----VTHCELDPTALYGISISIEGPGY : 711  
Pithovirus\_sibericum@YF\_0090 : VEEGVTVYKPKKIK-----GSDFCQTLLEGAVEYVDATEQD-QLVYA--QTLEMLREQRTE-----IANLLMKRNEACTIVDRICVPEEQVKEIRYRLEQVUSSEVDGFEVITNVANISDEEAYELYRKTLDLALSDLSCANEALERLSKKS--VTHCELNPNALFGISANVIEPLPEH : 752  
Cedratvirus\_All\_YF\_009329295 : IDDDKPDFTVYETKTKI-----GADFQTLLEEGAVEFIDAMEQE-HLYYA--QSLDDLRKRRDR-----LDSIMKKVEEARSLVRRLEAS-SSSASSLRQVLETK--RIIDDMETAIN-----VTHVMDPNLSLTAASVIEPLPGN : 698

5 6

gene\_54\_DhV1 : TDGKRLFYATRIFHHHTNEFLPGKFLSYFQCTPLVPGIPPECKNPKYL-----VANYKISRIDCPNSPGycpnspsycnspsycpnspsycpnsI-----SGSNSETVSETLTCSEFDVTV : 680  
gene\_25\_PaV1 : VDGRKLFYATRIFHHHTNRLILPGKLLALVYFQLPTEYVHEKrrkrkrkrksggggggvskrrCRFGVGSnggiadagggggdggvggggggaaeeeeeeRSRCYQELS-----FTSSSYDEFS--LYTILSPVYVVEEA sppppppsrkrkrkrssspDAAVPERR hqqqqdddAIDE : 767  
gene\_35\_CrV1 : VDGRKLFYATRIFHHHTNRMPLGRRLALGYFQLPTEYVYER hhhhhhh-----RRYRpls-----ptpspsyeps--p-mssspLYAAV sppppppppp-----slspppIDE : 690  
Golden\_Marseillevirus\_YF\_009 : NPSERLSYFASAPSSV-----AVPRCDYMYVPFDQ--HVHY-----FCKPITSKAGRI-----GLQDSISQ : 736  
Tokyovirus\_Al\_YF\_009254756 : NPSERLSYFASAPSSV-----AVPRLDFGIAPYDQ--HVRY-----FCKPITSSKAARI-----GMNESICQ : 753  
Melbournevirus\_YF\_009094523 : NPSERLSYFASAPSSV-----AVPRLDFGIAPYDQ--HVHY-----FCKPITSKASRI-----GMNKSICQ : 752  
Brazilian\_marseillevirus\_YF : NPSERLSYFASAPSSV-----AVPRLDYREALYDQ--HVHY-----FCAPIASKAGRI-----GMNDSISQ : 728  
Lausannevirus\_YF\_004346997 : NPSERLSYFASAPSSV-----AVPRLDDEVPYDQ--HVHY-----FQKSPASKAARI-----GLNDSISQ : 730  
Wiseana\_iridescent\_virus\_YF : TQSRNCFYTSYVQCPI-----GFVPCHN--LRETIVSHINNY-----FCKPITVDIAEF-----NGINEYNGI : 730  
Infectious\_spleen\_and\_kidney : TQSRNAYQSNMGCQPI-----GLPOLNYM--SRNDVILDVIMY-----FQVPSRSKAMDA-----SFDTMHGA : 665  
Lymphocystis\_disease\_virus\_Y : APSERLAYQSNMGCQPI-----GITTLTGKDRYDPTFYVVDY-----FCKAPARICYDR-----YKFDLMHGA : 623  
Singapore\_grouper\_iridovirus : TQSRNAYQSNMGCQPI-----GFPAINCE--DRYDATHRVDY-----FQSAITBSRAIER-----NFDTMAHGA : 691  
Frog\_virus\_3\_YF\_031641 : TQSRNAYQSNMGCQPI-----GFPAVNCS--DRYDATHRVDY-----FQKSPVDSRVKR-----GFDEMAHGA : 744  
Orpheovirus\_IHUMI\_LCC2\_YF\_00 : IQGPERITYQSSMGCQPI-----GLYASNEL-MRYDD-VKMLAN-----FTNPEVAANTYHI-----GFYKRAGR : 770  
Pithovirus\_sibericum@YF\_0090 : NMGERNMYTCGMGCQPI-----GAHHSNHF--LRFESVKMMA-----FSAPVFAQLNEW-----GLDELAGE : 811  
Cedratvirus\_All\_YF\_009329295 : NMGERNMYTCGMGCQPI-----GIYHSGHN--LRFESTIKMLAT-----FTPEFCQCTNEW-----GLNDLAGD : 758

R 5 6 k 6 1 P P

gene\_54\_DhV1 : KCFIQNTVVMHMIDIGNMPEGLINLSSLEPGLFYFERRTIIQK-----LTEQNLygv-----vdkkkkykylddggllk : 750  
gene\_25\_FaV1 : -CMYQLVVTMMDIGNMPEGLINLSSLEPGLFSHTEQRIVVFA-----IPQDKRILG-----AATSRLDYDGSGLIK----- : 836  
gene\_35\_CmV1 : -CMYQLVVTMMDIGNMPEGLINLSSLEPGLFSHTEQRIVVFA-----IPQDKRILG-----AVISNLDYDGTGVIK----- : 759  
Golden\_Marseillevirus\_YF\_009 : ---NLVVGCCFDDGMHATVACRFAFTQCGMVSDHVIQNSVAKIDSGEKLSFSPH-CQDVKFSQSCRLWCCKNGKVKVLCPECESEYVPSFAGHGKIVCRKKEDEPRAIDRQTVFNNRNPLNQDEPFGTKREKDSKQKFLGK-----KWECLCEDVEERPRLDLDSNGVVE----- : 899  
Tokyovirus\_Al\_YF\_009254756 : ---NLVVA CSYEGGCEPATAVACRFAFTQCGMVSDHVIQNSVAKIDSGEKLSFSPH-CQDVKFSQSCRLWCCKNGKVKVLCPECESEYVPSFAGHGKIVCRKKEDEPRAIDRQTVFNNRNPLNQDEPFGTKREKDSKQKFLGK-----KWECLCEDVEERPRLDLDSNGVVE----- : 919  
Melbournevirus\_YF\_009094523 : ---NLVVA CSYDGGCEPATAVACRFAFTQCGMVSDHVIQNSVAKIDHEKEQISPSR-CSDVEFSSSQCRFWCKNGKVKVLCPECGSEYVPSFSGHGKIVCRKKEDEPRAIDRQTVFNNRNPLNQDEPFGTKREKDSKQKFLGK-----KWECLCEDVEERPRLDLDSNGVVE----- : 906  
Brazilian\_marseillevirus\_YF\_009 : ---NLVVGCAFEQGCEPATAVACRFAFTQCGMVSDHVIQNSVAKIDHEKEQISPSR-CSDVEFSSSQCRFWCKNGKVKVLCPECGSEYVPSFSGHGKIVCRKKEDEPRAIDRQTVFNNRNPLNQDEPFGTKREKDSKQKFLGK-----KWECLCEDVEERPRLDLDSNGVVE----- : 885  
Lausannevirus\_YF\_004346997 : ---NLVVA CSYEDGCEPATAVACRFAFTQCGMVSDHVIQNSVAKIDHEKEQISPSR-CSDVEFSSSQCRFWCKNGKVKVLCPECGSEYVPSFSGHGKIVCRKKEDEPRAIDRQTVFNNRNPLNQDEPFGTKREKDSKQKFLGK-----KWECLCEDVEERPRLDLDSNGVVE----- : 887  
Wiseana\_iridescent\_virus\_YF\_009 : ---NLVVA CSYEDGCEPATAVACRFAFTQCGMVSDHVIQNSVAKIDHEKEQISPSR-CSDVEFSSSQCRFWCKNGKVKVLCPECGSEYVPSFSGHGKIVCRKKEDEPRAIDRQTVFNNRNPLNQDEPFGTKREKDSKQKFLGK-----KWECLCEDVEERPRLDLDSNGVVE----- : 806  
Infectious\_spleen\_and\_kidney : ---NLVVA CSYEDGCEPATAVACRFAFTQCGMVSDHVIQNSVAKIDHEKEQISPSR-CSDVEFSSSQCRFWCKNGKVKVLCPECGSEYVPSFSGHGKIVCRKKEDEPRAIDRQTVFNNRNPLNQDEPFGTKREKDSKQKFLGK-----KWECLCEDVEERPRLDLDSNGVVE----- : 745  
Lymphocystis\_disease\_virus\_Y : ---NLVVA CSYEDGCEPATAVACRFAFTQCGMVSDHVIQNSVAKIDHEKEQISPSR-CSDVEFSSSQCRFWCKNGKVKVLCPECGSEYVPSFSGHGKIVCRKKEDEPRAIDRQTVFNNRNPLNQDEPFGTKREKDSKQKFLGK-----KWECLCEDVEERPRLDLDSNGVVE----- : 700  
Singapore\_grouper\_iridovirus : ---NLVVA CSYEDGCEPATAVACRFAFTQCGMVSDHVIQNSVAKIDHEKEQISPSR-CSDVEFSSSQCRFWCKNGKVKVLCPECGSEYVPSFSGHGKIVCRKKEDEPRAIDRQTVFNNRNPLNQDEPFGTKREKDSKQKFLGK-----KWECLCEDVEERPRLDLDSNGVVE----- : 775  
Frog\_virus\_3\_YF\_031641 : ---NLVVA CSYEDGCEPATAVACRFAFTQCGMVSDHVIQNSVAKIDHEKEQISPSR-CSDVEFSSSQCRFWCKNGKVKVLCPECGSEYVPSFSGHGKIVCRKKEDEPRAIDRQTVFNNRNPLNQDEPFGTKREKDSKQKFLGK-----KWECLCEDVEERPRLDLDSNGVVE----- : 830  
Orpheovirus\_IHUMI\_LCC2\_YF\_00 : ---NLVVA CSYEDGCEPATAVACRFAFTQCGMVSDHVIQNSVAKIDHEKEQISPSR-CSDVEFSSSQCRFWCKNGKVKVLCPECGSEYVPSFSGHGKIVCRKKEDEPRAIDRQTVFNNRNPLNQDEPFGTKREKDSKQKFLGK-----KWECLCEDVEERPRLDLDSNGVVE----- : 845  
Pithovirus\_sibericum@YF\_0090 : ---NLVVA CSYEDGCEPATAVACRFAFTQCGMVSDHVIQNSVAKIDHEKEQISPSR-CSDVEFSSSQCRFWCKNGKVKVLCPECGSEYVPSFSGHGKIVCRKKEDEPRAIDRQTVFNNRNPLNQDEPFGTKREKDSKQKFLGK-----KWECLCEDVEERPRLDLDSNGVVE----- : 888  
Cedratvirus\_All\_YF\_009329295 : ---NLVVA CSYEDGCEPATAVACRFAFTQCGMVSDHVIQNSVAKIDHEKEQISPSR-CSDVEFSSSQCRFWCKNGKVKVLCPECGSEYVPSFSGHGKIVCRKKEDEPRAIDRQTVFNNRNPLNQDEPFGTKREKDSKQKFLGK-----KWECLCEDVEERPRLDLDSNGVVE----- : 836

gene\_54\_DhV1 : ---CNVVTIPDINVIUNTIMIGM--NENFELVL--VVPYMPESHK--YKFTLKSQDVRNDCKLDFEKTEF--LTLGDRLSRHGCKRVCVCDIRPAEDLFFLA-DGTH--PDIINSNSSLRSLSGVFEELRSQTLGK-----KIRKTF----- : 884  
gene\_25\_FaV1 : ---RGTFFVINDTIVLNAVLFGM--DDYFNLT--YTFLLAGSCK--NGFKTERVEVFDGNYVDFHESKLFH--VTEGDRLT--RHGCKRVCVCDIRPAEDLFFLA-DGTH--PDIINSNSSLRSLSGVFEELRSQTLGK-----KIRKTF----- : 973  
gene\_35\_CmV1 : ---CGILVTNDTIVLNAVLFGM--DDHFNLT--YTFLLAGSCK--NGFKTERVEVFDGNYVDFHESKLFH--VTEGDRLT--RHGCKRVCVCDIRPAEDLFFLA-DGTH--PDIINSNSSLRSLSGVFEELRSQTLGK-----KIRKTF----- : 894  
Golden\_Marseillevirus\_YF\_009 : ---VGE-VVEEDGILVAIS--EAGEGKR--KIKSYFGKDKRKT--TSVSYSRNNEKNIOT--IAVTSVRI--CVGDRAT--FHSCKR--VFSLFVPEENMFEF--DPYCASHPEFLINPLAF--PDRMT--GQPK--ESSAGKVTACALYS--STTDCSFF--TSNFE : 1046  
Tokyovirus\_Al\_YF\_009254756 : ---VGE-VVEEDGILVAIS--EAGEGKR--KIKSYFGKDKRKT--TSVSYSRNNEKNIOT--IAVTSVRI--CVGDRAT--FHSCKR--VFSLFVPEENMFEF--DPYCASHPEFLINPLAF--PDRMT--GQPK--ESSAGKVTACALYS--STTDCSFF--TSNFE : 1063  
Melbournevirus\_YF\_009094523 : ---VGE-VVEEDGILVAIS--EAGEGKR--KIKSYFGKDKRKT--TSVSYSRNNEKNIOT--IAVTSVRI--CVGDRAT--FHSCKR--VFSLFVPEENMFEF--DPYCASHPEFLINPLAF--PDRMT--GQPK--ESSAGKVTACALYS--STTDCSFF--TSNFE : 1053  
Brazilian\_marseillevirus\_YF\_009 : ---VGE-VVEEDGILVAIS--EAGEGKR--KIKSYFGKDKRKT--TSVSYSRNNEKNIOT--IAVTSVRI--CVGDRAT--FHSCKR--VFSLFVPEENMFEF--DPYCASHPEFLINPLAF--PDRMT--GQPK--ESSAGKVTACALYS--STTDCSFF--TSNFE : 1031  
Lausannevirus\_YF\_004346997 : ---VGE-VVEEDGILVAIS--EAGEGKR--KIKSYFGKDKRKT--TSVSYSRNNEKNIOT--IAVTSVRI--CVGDRAT--FHSCKR--VFSLFVPEENMFEF--DPYCASHPEFLINPLAF--PDRMT--GQPK--ESSAGKVTACALYS--STTDCSFF--TSNFE : 1033  
Wiseana\_iridescent\_virus\_YF\_009 : ---LRG-QKKKIVLIGRITIK--NKNEQEKV--VNSVVQGGEDY--DRIIT--DNIVDGRKVFVIVGQIRI--EIGDRFG--CGMACK--TCGMIYAC--DMFEFC--SGMT--PDIINPNCI--PDRMT--INQI--IATVMGKLYLT--N--SKFKQGN--FMENSST : 950  
Infectious\_spleen\_and\_kidney : ---ARGMFAAGVWVWVWVKMSFD--QSRPEGAC--CSAVKPEHEEYFDDKLVFNHMDCKKQV--IKRRTI--EMGDRFAS--FTACK--TCGMIYAC--DMFEFC--SGMT--PDIINPNCI--PDRMT--INQI--IATVMGKLYLT--N--SKFKQGN--FMENSST : 950  
Lymphocystis\_disease\_virus\_Y : ---IRLGRKKNKKGYSICNSLW--FACTVIVGKVS--KRLIDGVIVYV--VSTV--TKADEDCY--DEILDYVMVETGRV--V--IKRRTI--EIGDRFAS--FTACK--TCGMIYAC--DMFEFC--SGMT--PDIINPNCI--PDRMT--INQI--IATVMGKLYLT--N--SKFKQGN--FMENSST : 950  
Singapore\_grouper\_iridovirus : HVRKHHVAKNKQESRRITGGALACADTLW--FACTVIVGKVS--KRLIDGVIVYV--VSTV--TKADEDCY--DEILDYVMVETGRV--V--IKRRTI--EIGDRFAS--FTACK--TCGMIYAC--DMFEFC--SGMT--PDIINPNCI--PDRMT--INQI--IATVMGKLYLT--N--SKFKQGN--FMENSST : 944  
Frog\_virus\_3\_YF\_031641 : RVEGKRKAARFPAGQRTGGGAPGLCDLW--FACTVIVGKVS--KRLIDGVIVYV--VSTV--TKADEDCY--DEILDYVMVETGRV--V--IKRRTI--EIGDRFAS--FTACK--TCGMIYAC--DMFEFC--SGMT--PDIINPNCI--PDRMT--INQI--IATVMGKLYLT--N--SKFKQGN--FMENSST : 999  
Orpheovirus\_IHUMI\_LCC2\_YF\_00 : ---IGQ-YKKEIVVYARYRRRANPNENDENAGDIL--DJASTKLEYWDS--ENLISEGANRHS--TKV--RSTI--RPSDKFAARYACKATVGAIIPK--DIFEIFPFGV--PDIINPNCI--PDRMT--INQI--IATVMGKLYLT--N--SKFKQGN--FMENSST : 992  
Pithovirus\_sibericum@YF\_0090 : ---IGY-SVEPQVLLSKTR--ENRVTGRI--EIDNRVVGIGER--V--DRILIDKNEEGLTLV--KVR--RDLV--LSTI--EIGDRFAS--FTACK--TCGMIYAC--DMFEFC--SGMT--PDIINPNCI--PDRMT--INQI--IATVMGKLYLT--N--SKFKQGN--FMENSST : 1033  
Cedratvirus\_All\_YF\_009329295 : ---IGR-AEACIVLISKSR--RNTVTGKV--DVENRIGIGER--V--ERVILDRNEEGLTLV--KVR--RDLV--LSTI--EIGDRFAS--FTACK--TCGMIYAC--DMFEFC--SGMT--PDIINPNCI--PDRMT--INQI--IATVMGKLYLT--N--SKFKQGN--FMENSST : 980

gene\_54\_DhV1 : ---SGIGCGVIGKHE--WGFISL--VLDQLADHKKYICTQSETNRCKF--GQKKEGRSQCGGFRVGVLEVASIRASGLQF--RDR--STNSDQIK--LLOSROKMLQHLK--RNGD--QYQCFPHNTI--IPKTV--SKCM--YIC--IVL--SN--KIC-- : 1027  
gene\_25\_FaV1 : ---SGIGCGVIGKHE--WGFISL--VLDQLADHKKYICTQSETNRCKF--GQKKEGRSQCGGFRVGVLEVASIRASGLQF--RDR--STNSDQIK--LLOSROKMLQHLK--RNGD--QYQCFPHNTI--IPKTV--SKCM--YIC--IVL--SN--KIC-- : 1124  
gene\_35\_CmV1 : ---SGIGCGVIGKHE--WGFISL--VLDQLADHKKYICTQSETNRCKF--GQKKEGRSQCGGFRVGVLEVASIRASGLQF--RDR--STNSDQIK--LLOSROKMLQHLK--RNGD--QYQCFPHNTI--IPKTV--SKCM--YIC--IVL--SN--KIC-- : 1041  
Golden\_Marseillevirus\_YF\_009 : I---VESELKRRGYAPGGKEFFIDR--GKRMEVAL--FVGSVAEN--RLKHMV--DK--MHP--ATGKIQSL--RQTEGRSRNGGLRIGGNERDCL--GNGL--TFC--RDR--FSSCD--R--D--WCOT--SGG--I--AINV--EGRK-- : 1211  
Tokyovirus\_Al\_YF\_009254756 : I---VEDELKRRGYAPGGKEFFIDR--GKRMEVAL--FVGSVAEN--RLKHMV--DK--MHP--ATGKIQSL--RQTEGRSRNGGLRIGGNERDCL--GNGL--TFC--RDR--FSSCD--R--D--WCOT--SGG--I--AINV--EGRK-- : 1226  
Melbournevirus\_YF\_009094523 : V---VEDELKRRGYAPGGKEFFIDR--GKRMEVAL--FVGSVAEN--RLKHMV--DK--MHP--ATGKIQSL--RQTEGRSRNGGLRIGGNERDCL--GNGL--TFC--RDR--FSSCD--R--D--WCOT--SGG--I--AINV--EGRK-- : 1216  
Brazilian\_marseillevirus\_YF\_009 : I---VEDELKRRGYAPGGKEFFIDR--GKRMEVAL--FVGSVAEN--RLKHMV--DK--MHP--ATGKIQSL--RQTEGRSRNGGLRIGGNERDCL--GNGL--TFC--RDR--FSSCD--R--D--WCOT--SGG--I--AINV--EGRK-- : 1194  
Lausannevirus\_YF\_004346997 : I---VEDELKRRGYAPGGKEFFIDR--GKRMEVAL--FVGSVAEN--RLKHMV--DK--MHP--ATGKIQSL--RQTEGRSRNGGLRIGGNERDCL--GNGL--TFC--RDR--FSSCD--R--D--WCOT--SGG--I--AINV--EGRK-- : 1196  
Wiseana\_iridescent\_virus\_YF\_009 : I---VEDELKRRGYAPGGKEFFIDR--GKRMEVAL--FVGSVAEN--RLKHMV--DK--MHP--ATGKIQSL--RQTEGRSRNGGLRIGGNERDCL--GNGL--TFC--RDR--FSSCD--R--D--WCOT--SGG--I--AINV--EGRK-- : 1111  
Infectious\_spleen\_and\_kidney : A---DLIKTLEELGYA---KQVMYGR--GRFESLV--FMAPCPYQ--RLKHMV--DK--MHP--ATGKIQSL--RQTEGRSRNGGLRIGGNERDCL--GNGL--TFC--RDR--FSSCD--R--D--WCOT--SGG--I--AINV--EGRK-- : 1044  
Lymphocystis\_disease\_virus\_Y : I---DELRELALKLETW--ETTMYGGL--GGRFASKI--FIGPCDYQ--RLKHMV--DK--MHP--ATGKIQSL--RQTEGRSRNGGLRIGGNERDCL--GNGL--TFC--RDR--FSSCD--R--D--WCOT--SGG--I--AINV--EGRK-- : 1017  
Singapore\_grouper\_iridovirus : I---VDIADAKEAGIEHW--DSVMYSGI--GRFPAKI--FMAPCPYQ--RLKHMV--DK--MHP--ATGKIQSL--RQTEGRSRNGGLRIGGNERDCL--GNGL--TFC--RDR--FSSCD--R--D--WCOT--SGG--I--AINV--EGRK-- : 1103  
Frog\_virus\_3\_YF\_031641 : V---VVDIAEAKEAGIEHW--DSVMYSGI--GRFPAKI--FMAPCPYQ--RLKHMV--DK--MHP--ATGKIQSL--RQTEGRSRNGGLRIGGNERDCL--GNGL--TFC--RDR--FSSCD--R--D--WCOT--SGG--I--AINV--EGRK-- : 1158  
Orpheovirus\_IHUMI\_LCC2\_YF\_00 : Y---DDLERYIRAHGLASSGKVTFFR--DNGATVIGV--MYGYIYQ--ALKHH--KIK--MCP--ATGQNDP--V--RQV--KGR--R--R--V--G--M--ERDAV--SHG--TGT--SQA--T--CKD--S--G--V--TAY--V--C--G--T--L--S--R--L--V--D--V--R-- : 1167  
Pithovirus\_sibericum@YF\_0090 : I---RTFEENLVQYGYERRGTEQLYSV--GRFPAKI--FMAPCPYQ--RLKHMV--DK--MHP--ATGKIQSL--RQTEGRSRNGGLRIGGNERDCL--GNGL--TFC--RDR--FSSCD--R--D--WCOT--SGG--I--AINV--EGRK-- : 1206  
Cedratvirus\_All\_YF\_009329295 : I---EAFECALPCYGYERRGTERLTS--GTG--ALECET--FIGPCYHM--MLPHLV--KGR--MCP--ATGQNDP--V--RQV--KGR--R--R--V--G--M--ERDAV--SHG--TGT--SQA--T--CKD--S--G--V--TAY--V--C--G--T--L--S--R--L--V--D--V--R-- : 1152

g tG y l h v K e r QP GRs Gg 4 G 6E Ga 1 D C C 6 C C y k q 6 g
